# Supplementary material
Source: PubMed Central journal article supplement (PMC7416568)
Supplement: NIHPP2020.07.23.20161208-supplement-1.pdf [file NIHPP2020.07.23.20161208-supplement-1.pdf]

291 Supplementary Materials Outline:  
292

A1 Reported SARS-CoV-2 case counts, mortality, and testing in sub-Saharan Africa as of June 2020

Table S1: Sub-Saharan Africa country codes, case counts, and testing

Figure S1: Variation between SSA countries in testing and reporting rates

A2 Synthesizing factors hypothesized to increase or decrease SARS-CoV-2 epidemic risk in SSA

Table S2: Dimensions of risk and expected direction of effect on SARS-CoV-2 transmission or burden in sub-Saharan Africa (SSA) relative to higher latitude countries

Table S3: Variables and data sources

Figure S2: Year of most recent data available for variables compared between global regions

Figure S3: Variation among sub-Saharan African countries in determinants of SARS-CoV-2 risk by variable (a subset of variables is shown in Figure 2 in the main text)

Figure S4: Variation among sub-Saharan African countries in determinants of SARS-CoV-2 mortality risk by category (subsets of variables are shown in Figure 3 in the main text)

Data File 1: Data for all compiled indicators

A3 Principal component analysis (PCA) of variables considered

Figure S5: PCAs of all variables and category specific subsets of variables

Data File 2: GDP, GINI Index, and tests completed data for PCA visualizations

A4 Evaluating the burden emerging from the severity of infection outcome

Table S4: Sources of age-stratified infection fatality ratio (*IFR*) estimates

Figure S6: Age profiles of comorbidities in sub-Saharan Africa countries

A5 International air travel to sub-Saharan Africa

Table S5: Arrivals to SSA airports by the number of passenger seats and status of the SARS-CoV-2 pandemic at the origin at the time of travel

A6 Subnational connectivity among countries in sub-Saharan Africa

Metapopulation model methods

Figure S7: Pace of the outbreak

Figure S8: Cases and testing vs. the pace of the outbreak

A7 Modeling epidemic trajectories in scenarios where transmission rate depends on climate

Data on climate variation in SSA

Climate model methods

## 365 **A1 | Reported SARS-CoV-2 case counts, mortality, and testing in sub-** 366 **Saharan Africa as of June 2020**

367

### 368 *1.1. Variables and data sources for testing data*

369

370 The numbers of reported cases, deaths, and tests for the 48 studied sub-Saharan Africa (SSA)  
371 countries (**Table S1**) were sourced from the Africa Centers for Disease Control (CDC)  
372 dashboard on June 30, 2020 (<https://africacdc.org/covid-19/>). Africa CDC obtains data from the  
373 official Africa CDC Regional Collaborating Centre and member state reports. Differences in the  
374 timing of reporting by member states results in some variation in recency of data within the  
375 centralized Africa CDC repository, but the data should broadly reflect the relative scale of testing  
376 and reporting efforts across countries.

377

378 The countries or member states within SSA in this study follow the United Nations and Africa  
379 CDC listed regions of Southern, Western, Central, and Eastern Africa (not including Sudan).  
380 From the Northern Africa region, Mauritania is included in SSA.

381

382 For comparison to non-SSA countries, the number of reported cases in other geographic  
383 regions were obtained from the Johns Hopkins University Coronavirus Resource Center on  
384 June 30, 2020 (<https://coronavirus.jhu.edu/map.html>).

385

386 Case fatality ratios (*CFRs*) were calculated by dividing the number of reported deaths by the  
387 number of reported cases and expressed as a percentage. Positivity was calculated by dividing  
388 the number of reported cases by the number of reported tests. Testing and case rates were  
389 calculated per 100,000 population using population size estimates for 2020 from the United  
390 Nations Population Division<sup>38</sup>. As reported confirmed cases are likely to be a significant  
391 underestimate of the true number of infections, *CFRs* may be a poor proxy for the infection  
392 fatality ratio (*IFR*), defined as the proportion of infections that result in mortality<sup>4</sup>.

393

### 394 *1.2 Variation in testing and mortality rates*

395

396 Testing rates among SSA countries varied by multiple orders of magnitude: the number of tests  
397 completed per 100,000 population ranged from 6.50 in Tanzania to 13,508.13 in Mauritius  
398 (**Figure S1A**). The number of reported infections (i.e., positive tests) was strongly correlated  
399 with the number of tests completed (Pearson's correlation coefficient,  $r = 0.9667$ ,  $p < 0.001$ )  
400 (**Figure S1B**). As of June 30, 2020, no deaths due to SARS-CoV-2 were reported to the Africa  
401 CDC for five SSA countries (Eritrea, Lesotho, Namibia, Seychelles, Uganda). Among countries  
402 with at least one reported death, *CFR* varied from 0.22% in Rwanda to 8.54% in Chad (**Figure**  
403 **S1C**). Limitations in the ascertainment of infection rates and the rarity of reported deaths (e.g.,  
404 median number of reported deaths per SSA country was 25.5), indicate that the data are  
405 insufficient to determine country specific *IFRs* and *IFR* by age profiles. As a result, global *IFR* by  
406 age estimates were used for the subsequent analyses in this study.

407 **Table S1**  
 408 **Sub-Saharan Africa country country codes, case counts, and testing as of June 30, 2020**

| Country Name            | Country Code | Cases <sup>a</sup> | Deaths <sup>a</sup> | Tests <sup>a</sup> | Population <sup>b</sup> | Cases per 100k <sup>c</sup> | Tests per 100k <sup>c</sup> | Positivity (%) | CFR (%) |
|-------------------------|--------------|--------------------|---------------------|--------------------|-------------------------|-----------------------------|-----------------------------|----------------|---------|
| Angola                  | AGO          | 267                | 11                  | 22895              | 32866268                | 0.81                        | 69.66                       | 1.17           | 4.12    |
| Benin                   | BEN          | 1187               | 19                  | 20014              | 12123198                | 9.79                        | 165.09                      | 5.93           | 1.60    |
| Botswana                | BWA          | 89                 | 1                   | 36868              | 2351625                 | 3.78                        | 1567.77                     | 0.24           | 1.12    |
| Burkina Faso            | BFA          | 959                | 53                  | 9040               | 20903278                | 4.59                        | 43.25                       | 10.61          | 5.53    |
| Burundi                 | BDI          | 170                | 1                   | 2359               | 11890781                | 1.43                        | 19.84                       | 7.21           | 0.59    |
| Cameroon                | CMR          | 12592              | 313                 | 80000              | 26545864                | 47.43                       | 301.37                      | 15.74          | 2.49    |
| Cabo Verde              | CPV          | 1165               | 12                  | 22665              | 555988                  | 209.54                      | 4076.53                     | 5.14           | 1.03    |
| Central Africa Republic | CAF          | 3429               | 45                  | 23208              | 4829764                 | 71.00                       | 480.52                      | 14.78          | 1.31    |
| Chad                    | TCD          | 866                | 74                  | 4633               | 16425859                | 5.27                        | 28.21                       | 18.69          | 8.55    |
| Comoros                 | COM          | 293                | 7                   | 1173               | 869595                  | 33.69                       | 134.89                      | 24.98          | 2.39    |
| Côte d'Ivoire           | CIV          | 9101               | 66                  | 48340              | 26378275                | 34.50                       | 183.26                      | 18.83          | 0.73    |
| Congo (DRC)             | COD          | 6939               | 167                 | 24657              | 89561404                | 7.75                        | 27.53                       | 28.14          | 2.41    |
| Djibouti                | DJI          | 4656               | 53                  | 46108              | 988002                  | 471.25                      | 4666.79                     | 10.10          | 1.14    |
| Equatorial Guinea       | GNQ          | 2001               | 32                  | 16000              | 1402985                 | 142.62                      | 1140.43                     | 12.51          | 1.60    |
| Eritrea                 | ERI          | 191                | 0                   | 7943               | 3546427                 | 5.39                        | 223.97                      | 2.40           | 0.00    |
| Eswatini                | SWZ          | 781                | 11                  | 11094              | 1160164                 | 67.32                       | 956.24                      | 7.04           | 1.41    |
| Ethiopia                | ETH          | 5846               | 103                 | 250604             | 114963583               | 5.09                        | 217.99                      | 2.33           | 1.76    |
| Gabon                   | GAB          | 5209               | 40                  | 34774              | 2225728                 | 234.04                      | 1562.37                     | 14.98          | 0.77    |
| Gambia                  | GMB          | 45                 | 2                   | 2947               | 2416664                 | 1.86                        | 121.94                      | 1.53           | 4.44    |
| Ghana                   | GHA          | 17351              | 112                 | 294867             | 31072945                | 55.84                       | 948.95                      | 5.88           | 0.65    |
| Guinea                  | GIN          | 5291               | 30                  | 33737              | 13132792                | 40.29                       | 256.89                      | 15.68          | 0.57    |
| Guinea Bissau           | GNB          | 1614               | 21                  | 8056               | 1967998                 | 82.01                       | 409.35                      | 20.03          | 1.30    |
| Kenya                   | KEN          | 6190               | 144                 | 167417             | 53771300                | 11.51                       | 311.35                      | 3.70           | 2.33    |
| Lesotho                 | LSO          | 27                 | 0                   | 3000               | 2142252                 | 1.26                        | 140.04                      | 0.90           | 0.00    |
| Liberia                 | LBR          | 768                | 34                  | 6125               | 5057677                 | 15.18                       | 121.10                      | 12.54          | 4.43    |

409  
 410  
 411

412 (Table S1 continued)

| Country Name          | Country Code | Cases <sup>a</sup> | Deaths <sup>a</sup> | Tests <sup>a</sup> | Population <sup>b</sup> | Cases per 100k <sup>c</sup> | Tests per 100k <sup>c</sup> | Positivity (%) | CFR (%) |
|-----------------------|--------------|--------------------|---------------------|--------------------|-------------------------|-----------------------------|-----------------------------|----------------|---------|
| Madagascar            | MDG          | 2138               | 20                  | 21444              | 27691019                | 7.72                        | 77.44                       | 9.97           | 0.94    |
| Malawi                | MWI          | 1152               | 13                  | 13369              | 19129955                | 6.02                        | 69.89                       | 8.62           | 1.13    |
| Mali                  | MLI          | 2147               | 113                 | 12869              | 20250834                | 10.60                       | 63.55                       | 16.68          | 5.26    |
| Mauritania            | MRT          | 4149               | 126                 | 39398              | 4649660                 | 89.23                       | 847.33                      | 10.53          | 3.04    |
| Mauritius             | MUS          | 341                | 10                  | 171792             | 1271767                 | 26.81                       | 13508.13                    | 0.20           | 2.93    |
| Mozambique            | MOZ          | 859                | 5                   | 28586              | 31255435                | 2.75                        | 91.46                       | 3.00           | 0.58    |
| Namibia               | NAM          | 183                | 0                   | 8706               | 2540916                 | 7.20                        | 342.63                      | 2.10           | 0.00    |
| Niger                 | NER          | 1074               | 67                  | 6555               | 24206636                | 4.44                        | 27.08                       | 16.38          | 6.24    |
| Nigeria               | NGA          | 24567              | 565                 | 130164             | 206139587               | 11.92                       | 63.14                       | 18.87          | 2.30    |
| Congo (ROC)           | COG          | 1245               | 40                  | 11790              | 5518092                 | 22.56                       | 213.66                      | 10.56          | 3.21    |
| Rwanda                | RWA          | 900                | 2                   | 137751             | 12952209                | 6.95                        | 1063.53                     | 0.65           | 0.22    |
| São Tomé and Príncipe | STP          | 713                | 13                  | 17773              | 219161                  | 325.33                      | 8109.56                     | 4.01           | 1.82    |
| Senegal               | SEN          | 6698               | 108                 | 76343              | 16743930                | 40.00                       | 455.94                      | 8.77           | 1.61    |
| Seychelles            | SYC          | 77                 | 0                   | 704                | 98340                   | 78.30                       | 715.88                      | 10.94          | 0.00    |
| Sierra Leone          | SLE          | 1427               | 60                  | 9973               | 7976985                 | 17.89                       | 125.02                      | 14.31          | 4.20    |
| Somalia               | SOM          | 2894               | 90                  | 11807              | 15893219                | 18.21                       | 74.29                       | 24.51          | 3.11    |
| South Africa          | ZAF          | 138134             | 2456                | 1567084            | 59308690                | 232.91                      | 2642.25                     | 8.81           | 1.78    |
| South Sudan           | SSD          | 2006               | 37                  | 10630              | 11193729                | 17.92                       | 94.96                       | 18.87          | 1.84    |
| Tanzania              | TZA          | 509                | 21                  | 3880               | 59734213                | 0.85                        | 6.50                        | 13.12          | 4.13    |
| Togo                  | TGO          | 642                | 14                  | 30316              | 8278737                 | 7.75                        | 366.19                      | 2.12           | 2.18    |
| Uganda                | UGA          | 870                | 0                   | 186200             | 45741000                | 1.90                        | 407.07                      | 0.47           | 0.00    |
| Zambia                | ZMB          | 1531               | 21                  | 53370              | 18383956                | 8.33                        | 290.31                      | 2.87           | 1.37    |
| Zimbabwe              | ZWE          | 567                | 6                   | 66712              | 14862927                | 3.81                        | 448.85                      | 0.85           | 1.06    |

413

414 <sup>a</sup> Data from Africa CDC as of June 30, 2020 (<https://africacdc.org/covid-19/>)

415 <sup>b</sup> Data from UN Population Division UNPOP (2019 revision) estimates of population by single calendar year (2020)<sup>38</sup>

416 <sup>c</sup> Rates per 100,000 population

417

418 **Figure S1**  
419 **Variation between SSA countries in testing and reporting rates as of June 30, 2020**  
420 **A:** Reported number of tests completed per country as of June 2020 (source: Africa CDC). **B:** Number of infections ( $I$ )  
421 per reported number of tests ( $T$ ); line shows linear regression:  $I = 8.454 \times 10^{-2} \times T - 8.137 \times 10^2$  ( $R^2 = 0.933$ ,  $p < 0.001$ ).

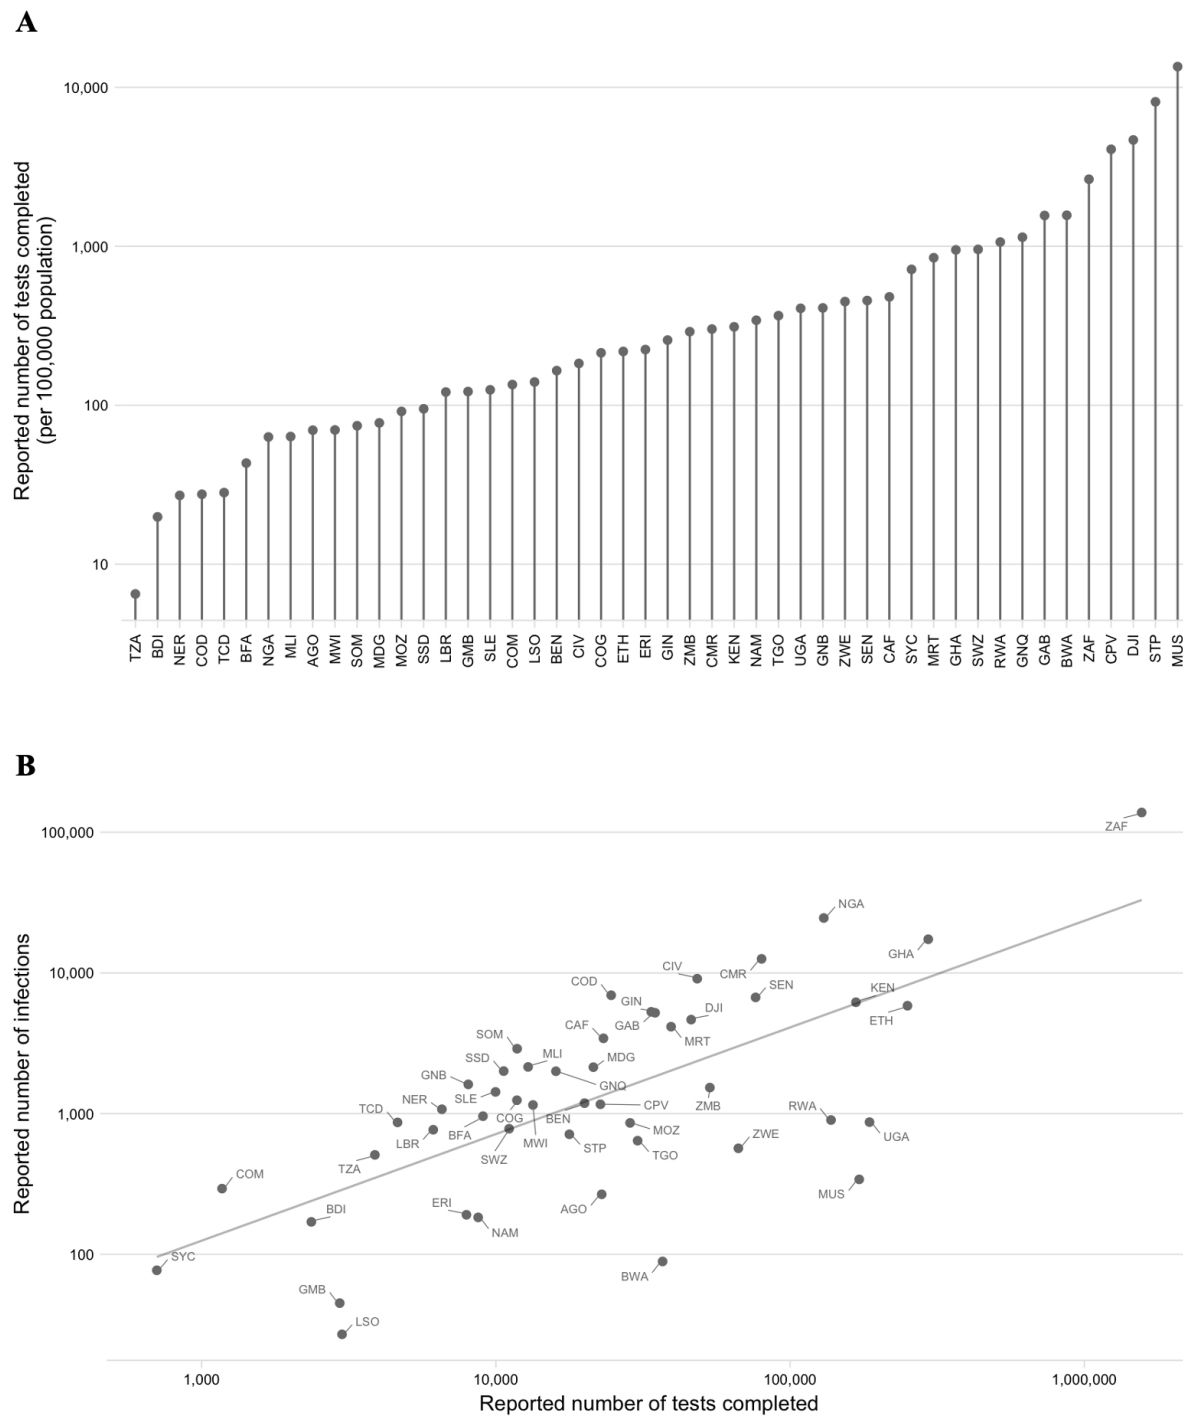

422  
423

424 (Figure S1 continued)  
 425 **C:** Reported infections and deaths for sub-Saharan African countries with case fatality ratios (CFRs) shown as  
 426 diagonal lines. **D:** Date of first detection per number of reported tests

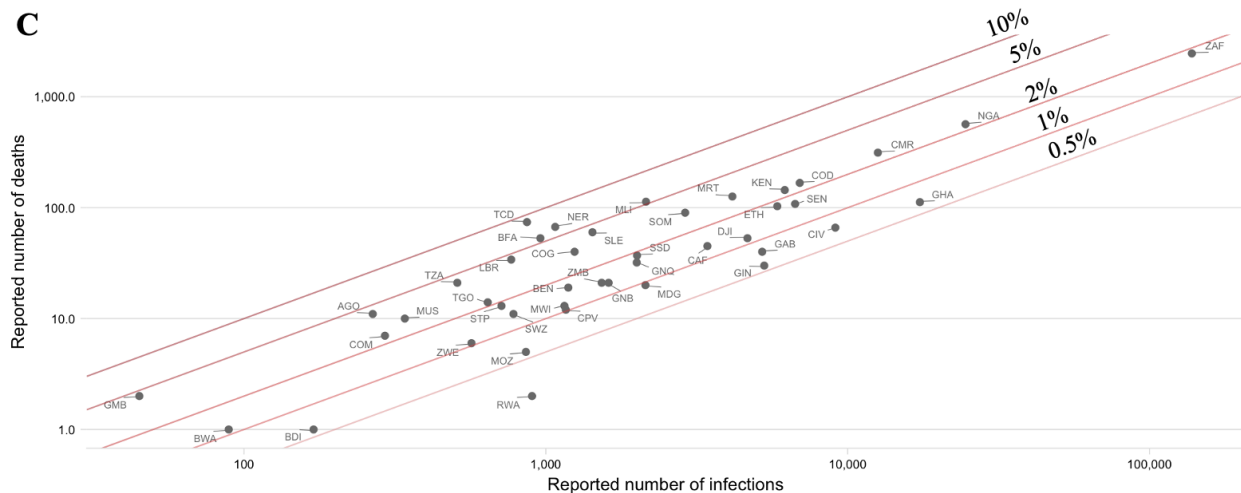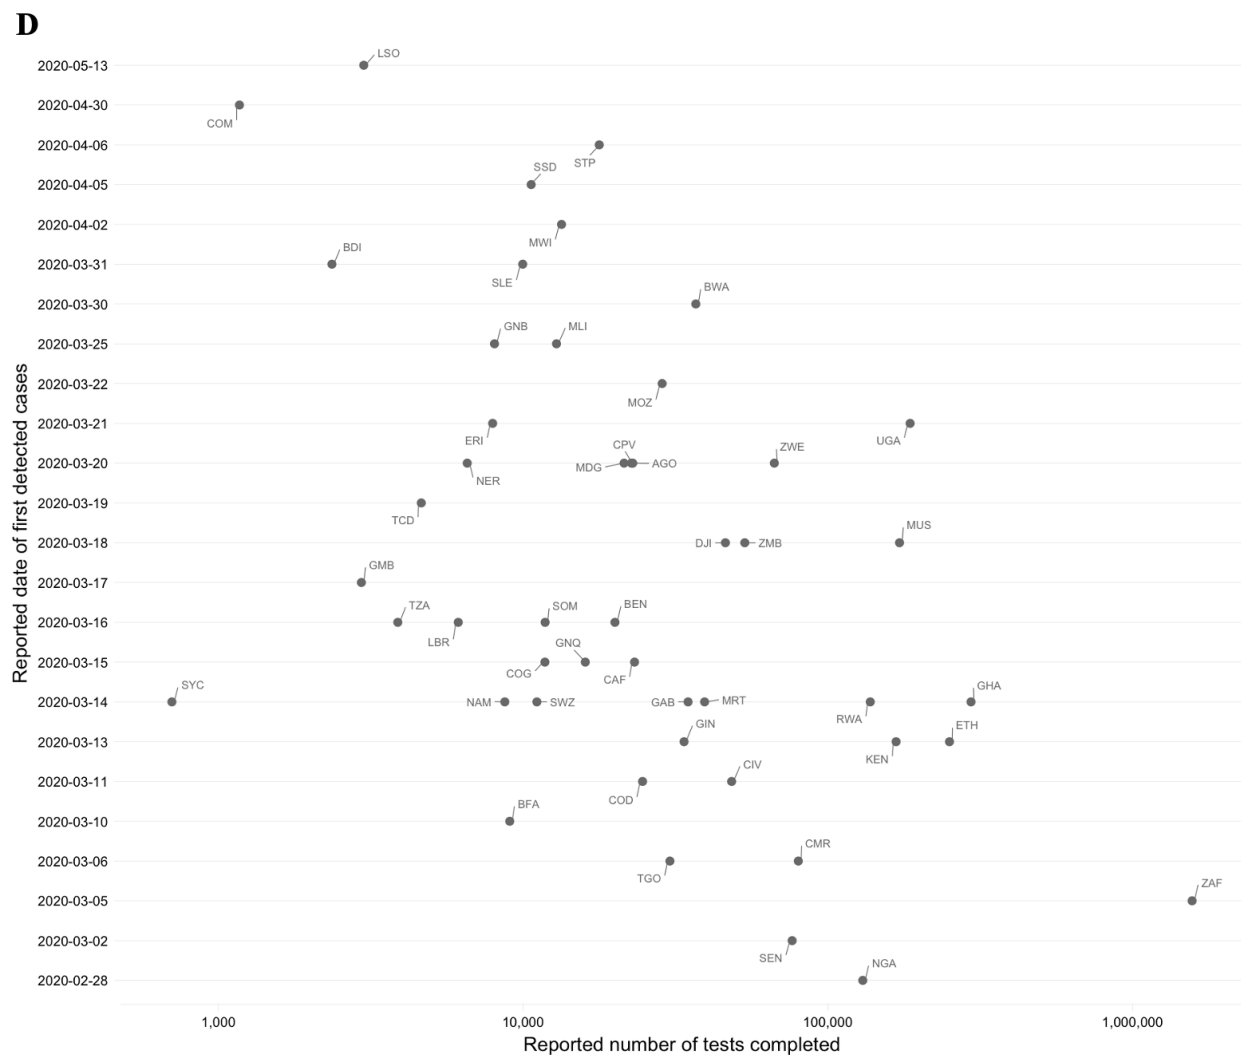

427

## 428 **A2 | Methods: Synthesizing factors hypothesized to increase or** 429 **decrease SARS-CoV-2 epidemic risk in SSA**

430

### 431 *2.1. Variable selection and data sources for variables hypothesized to associate with an* 432 *increased probability of severe clinical outcomes for an infection*

433

434 To characterize epidemic risk, defined as potential SARS-CoV-2 related morbidity and mortality,  
435 we first synthesized factors hypothesized to influence risk in SSA settings (**Table S2**). Early  
436 during the pandemic, evidence suggested that age was an important risk factor associated with  
437 morbidity and mortality associated with SARS-CoV-2 infection<sup>39</sup>, a pattern subsequently  
438 confirmed across settings<sup>2,9,40</sup>. Associations between SARS-CoV-2 mortality and comorbidities  
439 including hypertension, diabetes, and cardiovascular disease emerged early<sup>39</sup>; and have been  
440 observed across settings, with further growing evidence for associations with obesity<sup>9,41</sup>, severe  
441 asthma<sup>9</sup>, and respiratory effects of pollution<sup>42</sup>.

442

443 Many possible sources of bias complicate interpretation of these associations<sup>43</sup>, and while they  
444 provide a useful baseline, inference is also likely to change as the pandemic advances. To  
445 reflect this, our analysis combines a number of high level variables likely to broadly encompass  
446 these putative risk factors (e.g., non-communicable disease (NCD) related mortality and health  
447 life expectancy) with more specific measures encompassed in evidence to date (e.g.,  
448 prevalence of diabetes, obesity, and respiratory illness such as Chronic Obstructive Pulmonary  
449 Disease (COPD)). We also include measures relating to infectious diseases, undernourishment,  
450 and anemia given their interaction and effects in determining health status in these settings<sup>44</sup>.

451

452 Data on the identified indicators were sourced in May 2020 from the World Health Organization  
453 (WHO) Global Health Observatory (GHO) database (<https://www.who.int/data/gho>), World Bank  
454 (<https://data.worldbank.org/>), and other sources detailed in **Table S3**. National level  
455 demographic data (population size and age structure) was sourced from United Nations World  
456 Population Prospects (UNPOP)<sup>38</sup> and data on subnational variation in demography was  
457 sourced from WorldPop<sup>25</sup>. Household size data was defined by the mean number of individuals  
458 in a household with at least one person aged > 50 years, taken from the most recently available  
459 demographic health survey (DHS) data<sup>45</sup>. All country level data for all indicators can be found  
460 online at the [SSA-SARS-CoV-2-tool](https://labmetcalf.shinyapps.io/covid19-burden-africa/) (<https://labmetcalf.shinyapps.io/covid19-burden-africa/>).

461

462 Comparisons of national level estimates sourced from WHO and other sources are affected by  
463 variation within countries and variation in the uncertainty around estimates from different  
464 geographical areas. To assess potential differences in data quality between geographic areas  
465 we compared the year of most recent data for variables (**Figure S2**). The mean (range varied  
466 from 2014.624 to 2014.928 by region) and median year (2016 for all regions) of the most recent  
467 data varied little between regions. To account for uncertainty associated in the estimates  
468 available for a single variable, we also include multiple variables per category (e.g.,  
469 demographic and socio-economic factors, comorbidities, access to care) to avoid reliance on a  
470 single metric. This allows exploring variation between countries across a broad suite of  
471 variables likely to be indicative of the different dimensions of risk.

472  
473 Although including multiple variables that are likely to be correlated (see PCA methods below  
474 for further discussion) would bias inference of cumulative risk in a statistical framework, we do  
475 not attempt to quantitatively combine risk across variables for a country, nor project risk based  
476 on the variables included here. Rather, we characterize the magnitude of variation among  
477 countries for these variables (see **Figure 2** in the main text for a subset of the variables; **Figure**  
478 **3B** for bivariate risk maps following <sup>46</sup>) and then explore the range of outcomes that would be  
479 expected under scenarios where *IFR* increases with age at different rates (see **Figure 3** in the  
480 main text).

481  
482 *2.2. Variable selection and data sources for variables hypothesized to modulate the rate of viral*  
483 *spread*

484  
485 In addition to characterizing variation among factors likely to modulate burden, we also  
486 synthesize data sources relevant to the rate of viral spread, or pace, for the SARS-CoV-2  
487 pandemic in SSA. Factors hypothesized to modulate viral transmission and geographic spread  
488 include climatic factors (e.g., specific humidity), access to prevention measures (e.g.,  
489 handwashing), and human mobility (e.g., international and domestic travel). **Table S2** outlines  
490 the dimensions of risk selected and references the previous studies relevant to the selection of  
491 these factors.

492  
493 Climate data was sourced from the global, gridded ERA5 dataset <sup>47</sup> where model data is  
494 combined with global observation data (see **Section A7** for details).

495  
496 International flight data was obtained from a custom report from OAG Aviation Worldwide (UK)  
497 and included the departure location, airport of arrival, date of travel, and number of passenger  
498 seats for flights arriving to 113 international airports in SSA (see **Section A5**).

499  
500 As an estimate of connectivity within subregions of countries, the population weighted mean  
501 travel time to the nearest city with a population greater than 50,000 was determined; details are  
502 provided in **Section A6**. To obtain a set of measures that broadly represent connectivity within  
503 different countries in the region, friction surfaces from  $ref^{24}$  were used to obtain estimates of the  
504 connectivity between different administrative level 2 units within each country. Details of this,  
505 alongside the metapopulation model framework used to simulate viral spread with variation in  
506 connectivity are in **Section A6**.

507  
508 **Figure 2** in the main text shows variation among SSA countries for four of the variables; **Figure**  
509 **S3** shows variation for all variables. **Figure 3** in the main text shows variation for a subset of the  
510 comorbidity and access to care indicators as a heatmap; **Figure S4** shows variation for all the  
511 variables (both also available online at the [SSA-SARS-CoV-2-tool](https://labmetcalf.shinyapps.io/covid19-burden-africa/)  
512 (<https://labmetcalf.shinyapps.io/covid19-burden-africa/>)).



**Table S2**

**Hypothesized dimensions of risk and expected direction of effect on SARS-CoV-2 transmission or burden in sub-Saharan Africa (SSA) relative to higher latitude countries**

| Dimension of risk                                                | Factors hypothesized to <b>decrease</b> transmission or burden in sub-Saharan Africa relative to other geographic areas                                                                 | Factors hypothesized to <b>increase</b> transmission or burden in sub-Saharan Africa relative to other geographic areas                                                                                                                                                                                                                                                                   |
|------------------------------------------------------------------|-----------------------------------------------------------------------------------------------------------------------------------------------------------------------------------------|-------------------------------------------------------------------------------------------------------------------------------------------------------------------------------------------------------------------------------------------------------------------------------------------------------------------------------------------------------------------------------------------|
| <i>(A) Demographic and socio-economic characteristics in SSA</i> | Younger populations, and thus a smaller proportion of individuals in the older age groups that experience the highest mortality <sup>2-4</sup>                                          | A larger proportion of urban populations living in dense settings, which may result in higher transmission <sup>48</sup> ; higher contact with older individuals as a result of multi-generation households <sup>14</sup>                                                                                                                                                                 |
| <i>(B) Comorbidities in SSA</i>                                  | Lower rates of some comorbidities that have been associated with risk of worse outcomes, e.g., obesity <sup>9,41</sup>                                                                  | Higher rates of NCDs such as hypertension or COPD <sup>39</sup> , which are associated with worse outcomes; and a potential role for as yet undescribed interactions e.g., with anemia, or high prevalence infectious diseases                                                                                                                                                            |
| <i>(C) Climate in SSA</i>                                        | Warmer, wetter climates on average driving reduced transmission <sup>1,49</sup>                                                                                                         |                                                                                                                                                                                                                                                                                                                                                                                           |
| <i>(D) Capacity to deploy prevention measures in SSA</i>         | Experience with previous outbreak response which may yield more rapid and nimble approaches to reducing transmission <sup>21,22</sup>                                                   | Lower access to handwashing <sup>50,51</sup> and other prevention options such as self-isolation <sup>52</sup> , increasing transmission<br>Subregions of countries with reduced governance infrastructure <sup>53</sup>                                                                                                                                                                  |
| <i>(E) Access to healthcare in SSA</i>                           |                                                                                                                                                                                         | Larger variation in access to and coverage of health systems <sup>54</sup> including fewer medical staff and facilities such as hospital beds <sup>14</sup> increasing burden<br>Increased vulnerability to disruption of routine health services (e.g., <sup>31</sup> )<br>Limited testing capacity <sup>55</sup> reducing the capacity to identify and interrupt chains of transmission |
| <i>(F) Human mobility and travel in SSA</i>                      | Fewer viral importations due to reduced frequency of international travel <sup>29,30</sup><br>Decreased rate of internal spread due to less connectivity within countries <sup>56</sup> |                                                                                                                                                                                                                                                                                                                                                                                           |

**Table S3**

**Variables and data sources for indicators of SARS-CoV-2 epidemic risk in sub-Saharan Africa**

| ID                                                                                       | Variable                                                                                                                                                                                                                                                          | Source                 | Hypothesized association(s) with SARS-CoV-2 outcomes                                                                            |
|------------------------------------------------------------------------------------------|-------------------------------------------------------------------------------------------------------------------------------------------------------------------------------------------------------------------------------------------------------------------|------------------------|---------------------------------------------------------------------------------------------------------------------------------|
| <i>(A) Demographic and socio-economic characteristics</i>                                |                                                                                                                                                                                                                                                                   |                        |                                                                                                                                 |
| A1                                                                                       | Human population size; Proportion of population over age 50 (%) from the UN Population Division UNPOP (2019 revision) estimates of population by single calendar year (2020), age, and country                                                                    | UN <sup>38</sup>       | Morbidity and mortality observed to increase with age (e.g. <sup>2-4</sup> )                                                    |
| A2                                                                                       | Subnational spatial variation in the distribution of the human population and age structure                                                                                                                                                                       | WorldPop               |                                                                                                                                 |
| A3                                                                                       | Household size: Mean household size for households with an individual over age 50                                                                                                                                                                                 | DHS                    | Proxy for social contact rate for the elderly population at higher risk for SARS-CoV-2 morbidity and mortality <sup>14</sup>    |
| A4                                                                                       | Proportion of households with an individual over age 50                                                                                                                                                                                                           | DHS                    |                                                                                                                                 |
| A5                                                                                       | Health life expectancy (HALE) at age 60 (years)                                                                                                                                                                                                                   | WHO                    | Proxy for baseline health status of elderly population                                                                          |
| A6                                                                                       | Proportion of population below the poverty line (%)                                                                                                                                                                                                               | World Bank             | More severe clinical outcomes associated with poverty; A proxy for access to advanced care <sup>57,58</sup>                     |
| A7                                                                                       | Proportion of the urban population living in crowded, low quality housing (defined as households lacking one or more of the following conditions: access to improved water, access to improved sanitation, sufficient living area, and durability of housing) (%) | World Bank             | Indicator of capacity for prevention (e.g., through handwashing); Transmission observed to increase with crowding <sup>48</sup> |
| A8                                                                                       | Gross domestic product (GDP) per capita                                                                                                                                                                                                                           | World Bank             | Used in PCA analysis (see below) as an indicator of socio-economic status at the national level                                 |
| A9                                                                                       | GINI index, a measure of inequality in the distribution of income                                                                                                                                                                                                 | World Bank             |                                                                                                                                 |
| <i>(B) Comorbidities: General and nutrition related non-communicable diseases (NCDs)</i> |                                                                                                                                                                                                                                                                   |                        |                                                                                                                                 |
| B1                                                                                       | NCDs overall mortality per 100 000 popn, age-standardized                                                                                                                                                                                                         | WHO                    | Indicator of NCD burden in population; Comorbidities increase probability of severe clinical outcomes                           |
| B2                                                                                       | Cardiovascular disease related mortality per age group (annual deaths attributable per 100,000 population)                                                                                                                                                        | GDB 2017 <sup>59</sup> |                                                                                                                                 |
| B3                                                                                       | Diabetes prevalence among ages 20-79 (%)                                                                                                                                                                                                                          | World Bank             | Increases probability of severe clinical outcomes                                                                               |
| B4                                                                                       | Diabetes related mortality per age group (annual deaths attributable per 100,000 population)                                                                                                                                                                      | GDB 2017 <sup>59</sup> |                                                                                                                                 |

(Table S3 continued)

| ID                                                                                       | Variable                                                                                                                            | Source                 | Hypothesized association(s) with SARS-CoV-2 outcomes                                                               |
|------------------------------------------------------------------------------------------|-------------------------------------------------------------------------------------------------------------------------------------|------------------------|--------------------------------------------------------------------------------------------------------------------|
| <i>(B) Comorbidities: General and nutrition related non-communicable diseases (NCDs)</i> |                                                                                                                                     |                        |                                                                                                                    |
| B5                                                                                       | Raised glucose prevalence, age-standardized (%)                                                                                     | WHO                    | Indicator of metabolic disease risk; Metabolic disease increases probability of severe clinical outcomes           |
| B6                                                                                       | Raised blood pressure prevalence, age-standardized (%)                                                                              | WHO                    |                                                                                                                    |
| B7                                                                                       | Raised cholesterol prevalence, age-standardized (%)                                                                                 | WHO                    |                                                                                                                    |
| B8                                                                                       | Overweight prevalence among adults, age-standardized (%)                                                                            | WHO                    |                                                                                                                    |
| B9                                                                                       | Anemia prevalence among non-pregnant women (%)                                                                                      | WHO                    | Indicator of poor nutritional status; Poor nutritional status may increase probability of severe clinical outcomes |
| B10                                                                                      | Undernourishment prevalence (%)                                                                                                     | WHO                    |                                                                                                                    |
| <i>(B) Comorbidities: NCDs related to respiratory system and pollution</i>               |                                                                                                                                     |                        |                                                                                                                    |
| B11                                                                                      | Annual mean PM2.5 exposure in urban areas (ug/m3)                                                                                   | WHO                    | Exposure to air pollution increases mortality <sup>42</sup>                                                        |
| B12                                                                                      | Lung, tracheal, and esophageal cancer mortality per 100 000 popn, age-standardized                                                  | WHO                    | Indicator of prevalence and management of chronic disease and inflammation affecting the respiratory tract         |
| B13                                                                                      | Chronic respiratory diseases (excluding asthma) related mortality per age group (annual deaths attributable per 100,000 population) | GDB 2017 <sup>59</sup> |                                                                                                                    |
| B14                                                                                      | COPD mortality per 100 000 popn, age-standardized                                                                                   | WHO                    |                                                                                                                    |
| <i>(B) Comorbidities: Infectious diseases</i>                                            |                                                                                                                                     |                        |                                                                                                                    |
| B15                                                                                      | Respiratory infections mortality per 100 000 popn, age-standardized                                                                 | WHO                    | Indicator of prevalence and management of infectious disease affecting the respiratory tract                       |
| B16                                                                                      | TB incidence per 100 000 popn                                                                                                       | World Bank             | Indicator of susceptibility to respiratory infections and immune suppression                                       |
| B17                                                                                      | HIV prevalence among ages 15-49 (%)                                                                                                 | World Bank             | Indicator of immunosuppressed population                                                                           |
| <i>(C) Climate</i>                                                                       |                                                                                                                                     |                        |                                                                                                                    |
| C1                                                                                       | Seasonal change in specific humidity (in selected urban centers)                                                                    | ERA5 <sup>47</sup>     | Transmission rate of coronaviruses may decline with humidity                                                       |
| <i>(D) Capacity to deploy prevention measures</i>                                        |                                                                                                                                     |                        |                                                                                                                    |
| D1                                                                                       | Proportion of urban popn with basic handwashing facilities with water and soap at home (%)                                          | WHO                    | Handwashing observed to reduce infection rates for respiratory pathogens                                           |
| D2                                                                                       | Proportion of the population with access to a handwashing station with soap and water in 2019                                       | Ref <sup>60</sup>      |                                                                                                                    |

(Table S3 continued)

| ID                                                  | Variable                                                                                                                                 | Source            | Hypothesized association(s) with SARS-CoV-2 outcomes                                                           |
|-----------------------------------------------------|------------------------------------------------------------------------------------------------------------------------------------------|-------------------|----------------------------------------------------------------------------------------------------------------|
| <i>(D) Capacity to deploy prevention measures</i>   |                                                                                                                                          |                   |                                                                                                                |
| D3                                                  | Proportion of 1 year olds receiving full immunization coverage (%)                                                                       | WHO               | Proxy for coverage of routine health services                                                                  |
| D4                                                  | Reported number of completed tests reported for SARS-CoV-2 infection as of June 30, 2020                                                 | Africa CDC        | Indicator of surveillance capacity                                                                             |
| <i>(E) Access to healthcare in SSA</i>              |                                                                                                                                          |                   |                                                                                                                |
| E1                                                  | Proportion of children with pneumonia symptoms taken to a health facility (%)                                                            | WHO               | Proxy for access to medical care and care seeking                                                              |
| E2                                                  | Subnational spatial variation in the probability of seeking treatment for fever at public facilities                                     | Ref <sup>61</sup> |                                                                                                                |
| E3                                                  | Proportion of births attended by skilled staff (%)                                                                                       | World Bank        |                                                                                                                |
| E4                                                  | Nurses and midwives per 100 000 popn                                                                                                     | World Bank        | Indicators of treatment capacity                                                                               |
| E5                                                  | Physicians per 100 000 popn                                                                                                              | World Bank        |                                                                                                                |
| E6                                                  | Hospitals per 100 000 popn                                                                                                               | World Bank        |                                                                                                                |
| E7                                                  | Hospital beds 100 000 popn                                                                                                               | World Bank        |                                                                                                                |
| E8                                                  | Health expenditure per capita in (USD)                                                                                                   | WHO               | Proxy for health system resources; A significant predictor of intensive care unit (ICU) capacity <sup>62</sup> |
| E9                                                  | Proportion of health expenditures that are out-of-pocket (%)                                                                             | WHO               |                                                                                                                |
| <i>(F) Human mobility and travel: International</i> |                                                                                                                                          |                   |                                                                                                                |
| F1                                                  | Estimated number of international passengers arriving at SSA airports from January-April 2020                                            | OAG               | Indicator of the timing and number of introductions of SARS-CoV-2                                              |
| F2                                                  | Estimated number of international passengers arriving at SSA airports from January-April 2020 by SARS-CoV-2 status at departure location | OAG               |                                                                                                                |

(Table S3 continued)

| ID                                             | Variable                                                                                                                                                                                            | Source            | Hypothesized association(s) with SARS-CoV-2 outcomes                               |
|------------------------------------------------|-----------------------------------------------------------------------------------------------------------------------------------------------------------------------------------------------------|-------------------|------------------------------------------------------------------------------------|
| <i>(F) Human mobility and travel: Domestic</i> |                                                                                                                                                                                                     |                   |                                                                                    |
| F3                                             | National population-weighted mean travel time to the nearest city (national mean of indicator F4)                                                                                                   | Ref <sup>63</sup> | Indicator of connectivity within countries; A proxy for the rate of human mobility |
| F4                                             | Population-weighted mean travel time to the nearest city (population > 50,000) for administrative level 2 units                                                                                     | Ref <sup>63</sup> |                                                                                    |
| F5                                             | Relative costs of travel between centroids of administrative level 2 derived from friction surfaces obtained by integrating data on travel infrastructure (Open Street Map, land cover types, etc). | Ref <sup>24</sup> |                                                                                    |

533 **Figure S2**

534 **Year of most recent data available for variables compared between global regions**

535 Dotted vertical line shows regional median; solid vertical line shows regional mean. Note that most data comes from  
536 2015-2019 (median = 2016, mean = 2014.62-2014.93).  
537

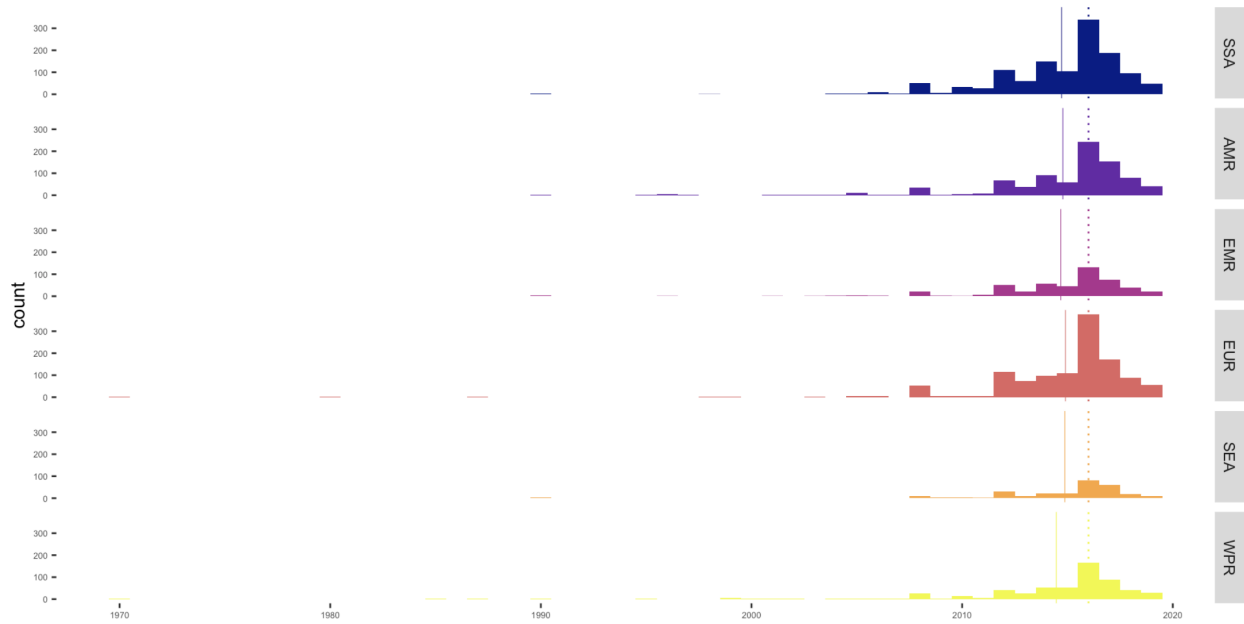

538  
539

REGION\_CODE

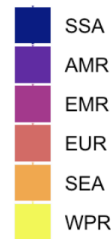

540  
541

542 **Figure S3**

543 **Variation among sub-Saharan African countries in determinants of SARS-CoV-2 risk by**  
544 **variable**

545 A subset of variables is shown in Figure 2A-D in the main text, the remaining variables are  
546 shown in supplementary file “Figure S3 compiled.pdf” and available online: [SSA-SARS-CoV-2-](#)  
547 [tool](#) (<https://labmetcalf.shinyapps.io/covid19-burden-africa/>)

548 **Figure S4**

549 **Variation among sub-Saharan African countries in determinants of SARS-CoV-2 mortality**  
550 **risk by category**

551 A subset of variables is shown in Figure 3D-E in the main text, the remaining variables are shown and available  
552 online: [SSA-SARS-CoV-2-tool](https://labmetcalf.shinyapps.io/covid19-burden-africa/) (<https://labmetcalf.shinyapps.io/covid19-burden-africa/>)

553 **A:** Select national level indicators; estimates of increased comorbidity burden (e.g., higher prevalence of raised blood  
554 pressure) shown with darker red for higher risk quartiles Countries missing data for an indicator (NA) are shown in  
555 gray. For comparison between countries, estimates are age-standardized where applicable (see **Table S3** for details)

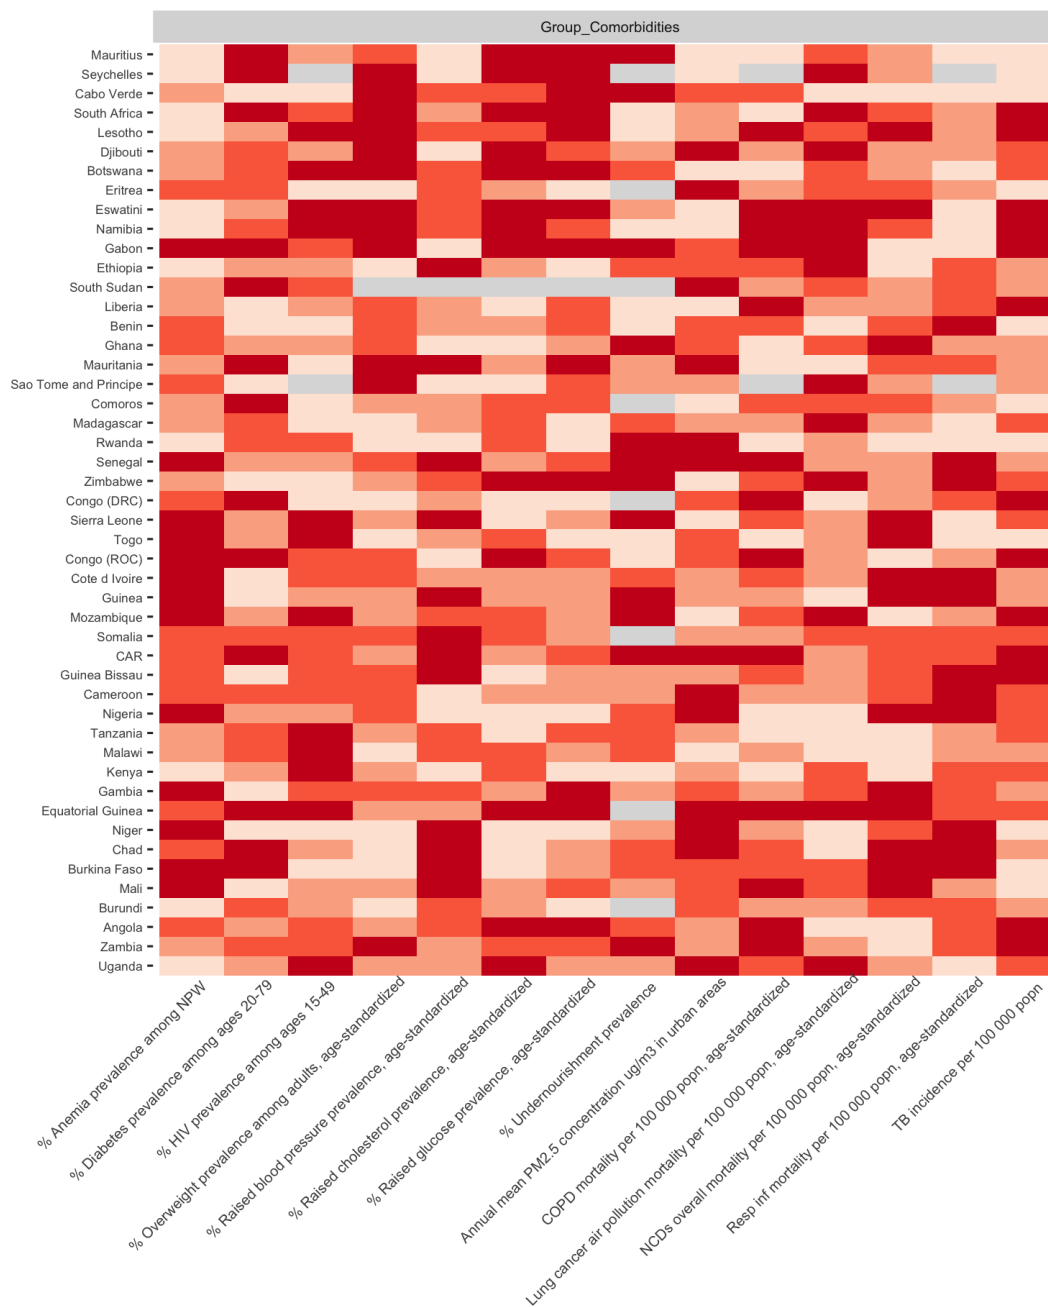

556

557

558



559 **B:** Select national level indicators; estimates of reduced access to care (e.g., fewer hospitals) shown with darker red  
 560 for higher risk quartiles Countries missing data for an indicator (NA) are shown in gray. For comparison between  
 561 countries, estimates are age-standardized where applicable (see **Table S3** for details)

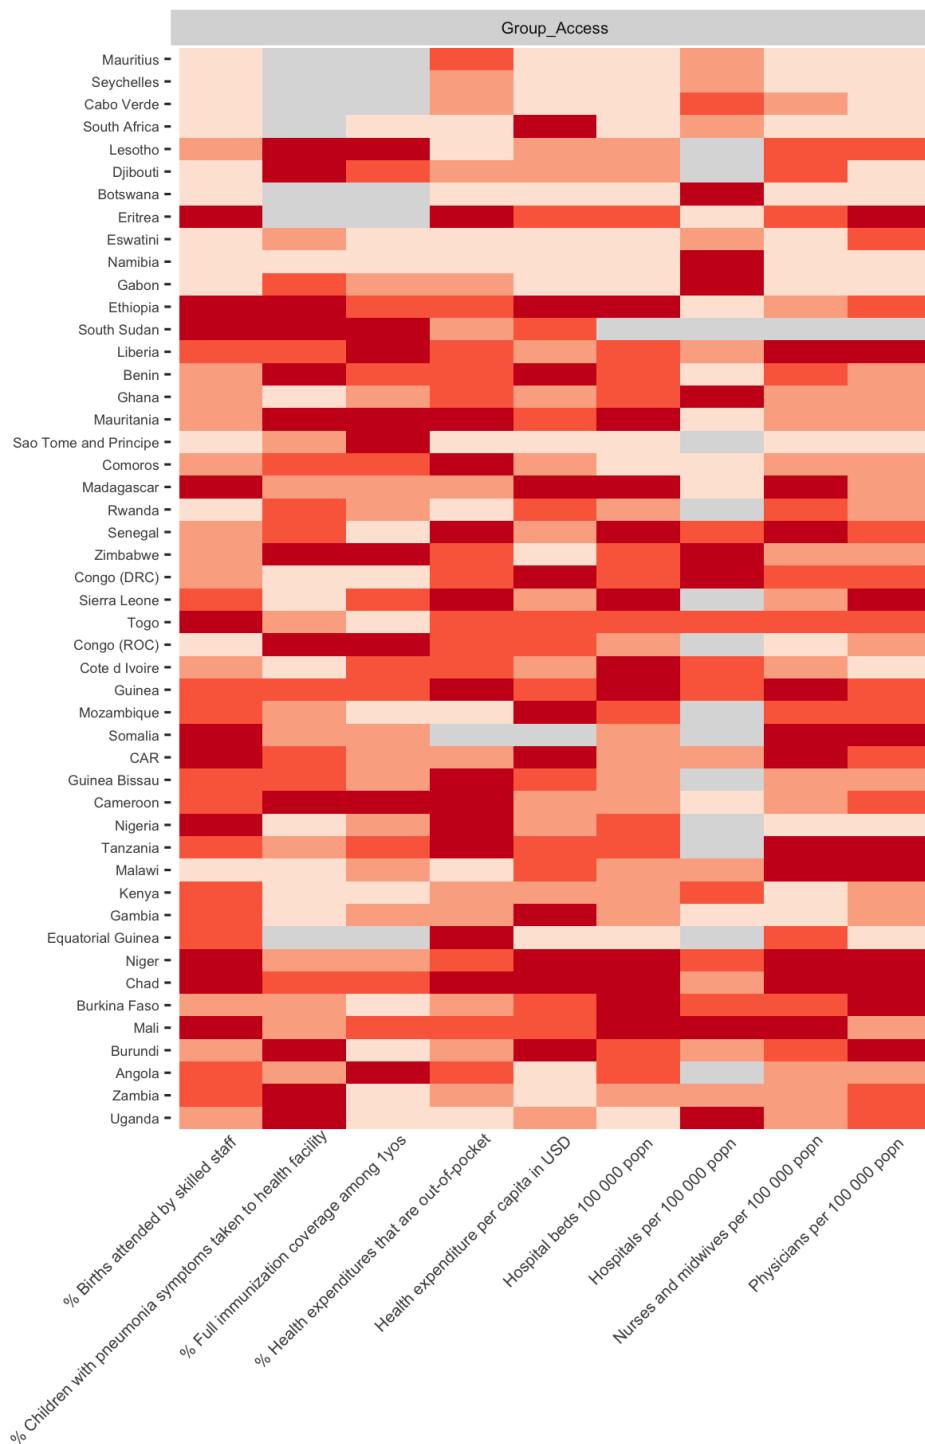

562

## 563 **A3 | Principal component analysis (PCA) of variables considered**

564

### 565 *3.1 Selection of data and variables*

566

567 The 29 national level variables from **Table S3** were selected for principal component analysis  
568 (PCA). We conducted further PCA on the subset of eight indicators related to access to  
569 healthcare (Category E) and the 14 national indicators variables related to comorbidities  
570 (Category B).

571

572 We excluded disaggregated sub-national spatial variation data (variables A2, C1, E2, and  
573 Category F), disaggregated or redundant variables derived from already included variables  
574 (variables A4 and D2), and disaggregated age-specific disease data from IHME global burden  
575 of disease study (variables B2, B4, and B13) from PCA analysis. COVID-19 tests per 100,000  
576 population (variable D4, **Table S1**), per capita gross domestic product (GDP) (Variable A8), and  
577 the GINI index of wealth inequality (Variable A9) were used to visualize patterns among sub-  
578 Saharan Africa countries.

579

580 In some cases, data were missing for a country for an indicator; in these cases, missing data  
581 were replaced with a zero value. This is a conservative approach as zero values (i.e., outside  
582 the range of typical values seen in the data) inflate the total variance in the data set and thus, if  
583 anything, deflate the percent of the variance explained by PCA. Therefore, this approach avoids  
584 mistakenly attributing predictive value to principal components due to incomplete data. See  
585 **Table S3** for data sources for each variable.

586

### 587 *3.2 Principal Component Analysis*

588

589 The PCA was conducted on each of the three subsets described above, using the scikitlearn  
590 library<sup>64</sup>. In order to avoid biasing the PCA due to large differences in magnitude and scale,  
591 each feature was centered around the mean, and scaled to unit variance prior to the analysis.  
592 Briefly, PCA applies a linear transformation to a set of  $n$  features to output a set of  $n$  orthogonal  
593 principal components which are uncorrelated and each explain a percentage of the total  
594 variance in the dataset<sup>65</sup>. A link to the code for this analysis is available online at the **SSA-**  
595 **SARS-CoV-2-tool** (<https://labmetcalf.shinyapps.io/covid19-burden-africa/>).

596

597 The principal components were then analyzed for the percentage of variance explained, and  
598 compared to: (i) the number of COVID-19 tests per 100,000 population as of the end of June,  
599 2020 (**Table S1**), (ii) the per capita GDP, and (iii) the GINI index of wealth inequality. For the  
600 GINI index, estimates from 2008-2018 were available for 45 of the 48 countries (no GINI index  
601 data were available for Eritrea, Equatorial Guinea, and Somalia) (see **Data File 1** for the year  
602 for each country for each metric).

603

604

605

606

### 607 3.3 PCA Results

608

609 The first two principal components from the analysis of 29 variables explain 32.6%, and 13.1%  
610 the total variance, respectively, in the dataset. Countries with higher numbers of completed  
611 SARS-CoV-2 tests reported tended to associate with an increase in principal component 1  
612 (Pearson correlation coefficient,  $r = 0.67$ ,  $p = 1.1e-7$ , **Figure S5A**). Similarly, high GDP  
613 countries seem to associate with an increase in principal component 1 (Pearson correlation  
614 coefficient,  $r = 0.80$ ,  $p = 6.02e-12$ ), **Figure S5B**). In contrast, countries with greater wealth  
615 inequality (as measured by the GINI index) are associated with a decrease in principal  
616 component 2 (Pearson correlation coefficient,  $r = -0.42$ ,  $p = .0042$ , **Figure S5C**). Despite these  
617 correlations, a relatively low percentage of variance is explained by each principal component:  
618 for the 29 variables, 13 of the 29 principal components are required to explain 90% of the  
619 variance (**Figure S5D**). When only the access to care subset of variables is considered, the first  
620 two principal components explain 50.7% and 19.1% of the variance, respectively, and five of  
621 eight principal components are required to explain 90% of the variance. When only the  
622 comorbidities subset is considered, the first two principal components explain 27.9% and 17.8%  
623 of the variance, respectively, and nine of 14 principal components are required to explain 90%  
624 of the variance (**Figure S4D**).

625

### 626 3.4 PCA Discussion

627

628 These data suggest that inter-country variation in this dataset is not easily explained by a small  
629 number of variables. Moreover, though correlations exist between principal components and  
630 high-level explanatory variables (testing capacity, wealth), their magnitude is modest. These  
631 results highlight that dimensionality reduction is unlikely to be an effective analysis strategy for  
632 the variables considered in this study. Despite this overall finding, the PCA on the access to  
633 care subset of variables highlights that the variance in these variables is more easily explained  
634 by a small number of principal components, and hence may be more amenable to  
635 dimensionality reduction. This finding is unsurprising as, for example, the number of hospital  
636 beds per 100,000 population is likely to be directly related to the number of hospitals per  
637 100,000 population (indeed  $r = 0.60$ ,  $p = 5.7e-6$  for SSA). In contrast, for comorbidities, the  
638 relationship between different variables is less clear. Given the low percentages of variation  
639 captured by each principal component, and the high variability between different types of  
640 variables, these results motivate a holistic approach to using these data for assessing relative  
641 SARS-CoV-2 risk across SSA.

642 **Figure S5**  
643 **Principal Component Analysis of all variables and category specific subsets of variables**  
644 **A:** Principal Component 1 and 2, countries colored by Log10 scaled tests per 100,000 population (as of June 30,  
645 2020)

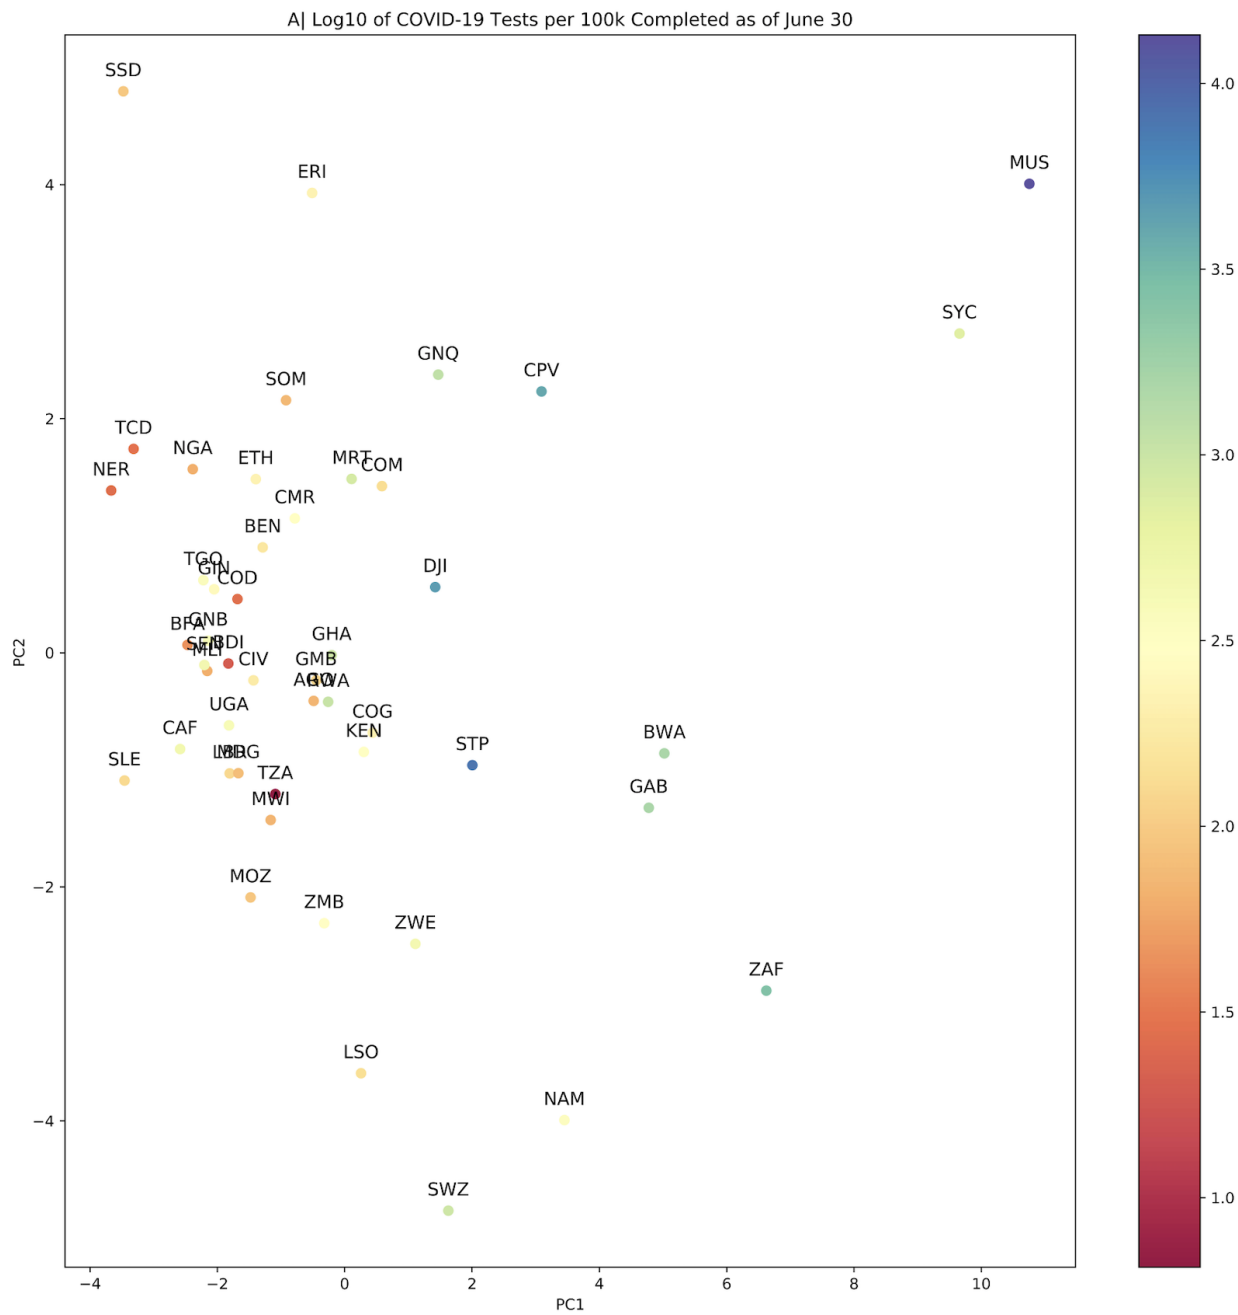

646  
647

648 (Figure S5 continued)

649 **Figure S5**

650 **Principal Component Analysis of all variables and category specific subsets of variables**

651 **B: Principal Component 1 and 2, countries colored by Log10 scaled GDP per capita**

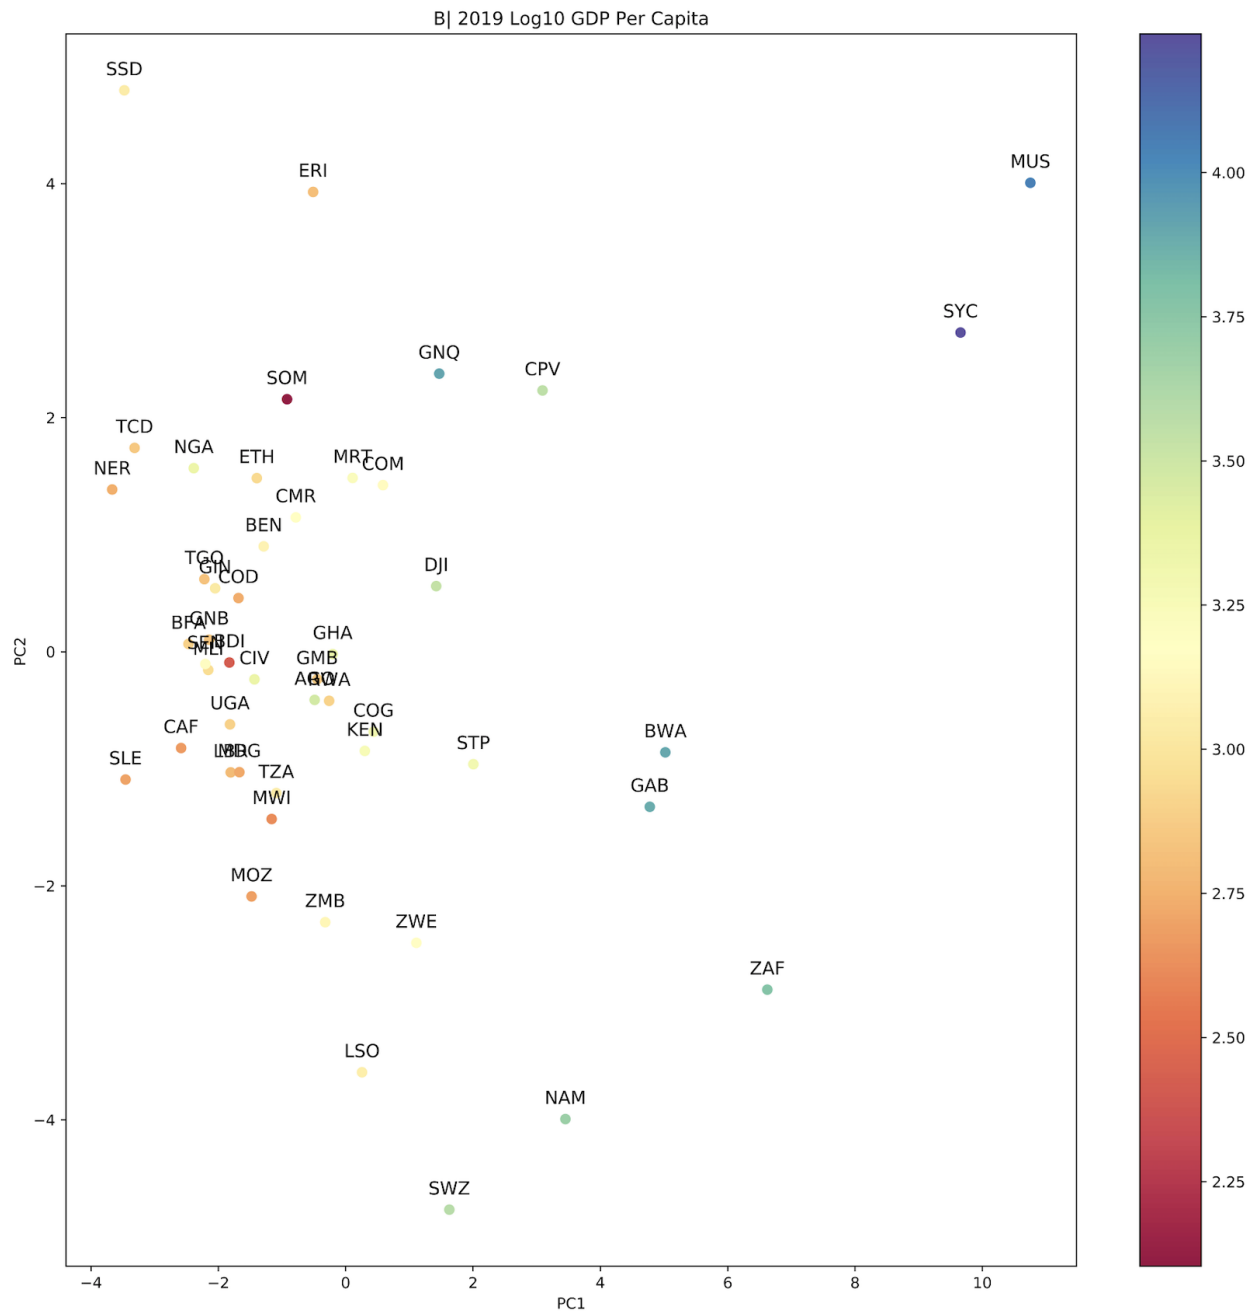

652  
653  
654

655 (Figure S5 continued)

656 **Figure S5**

657 **Principal Component Analysis of all variables and category specific subsets of variables**

658 **C: Principal Component 1 and 2, countries colored by the GINI index (a measure of wealth disparity)**

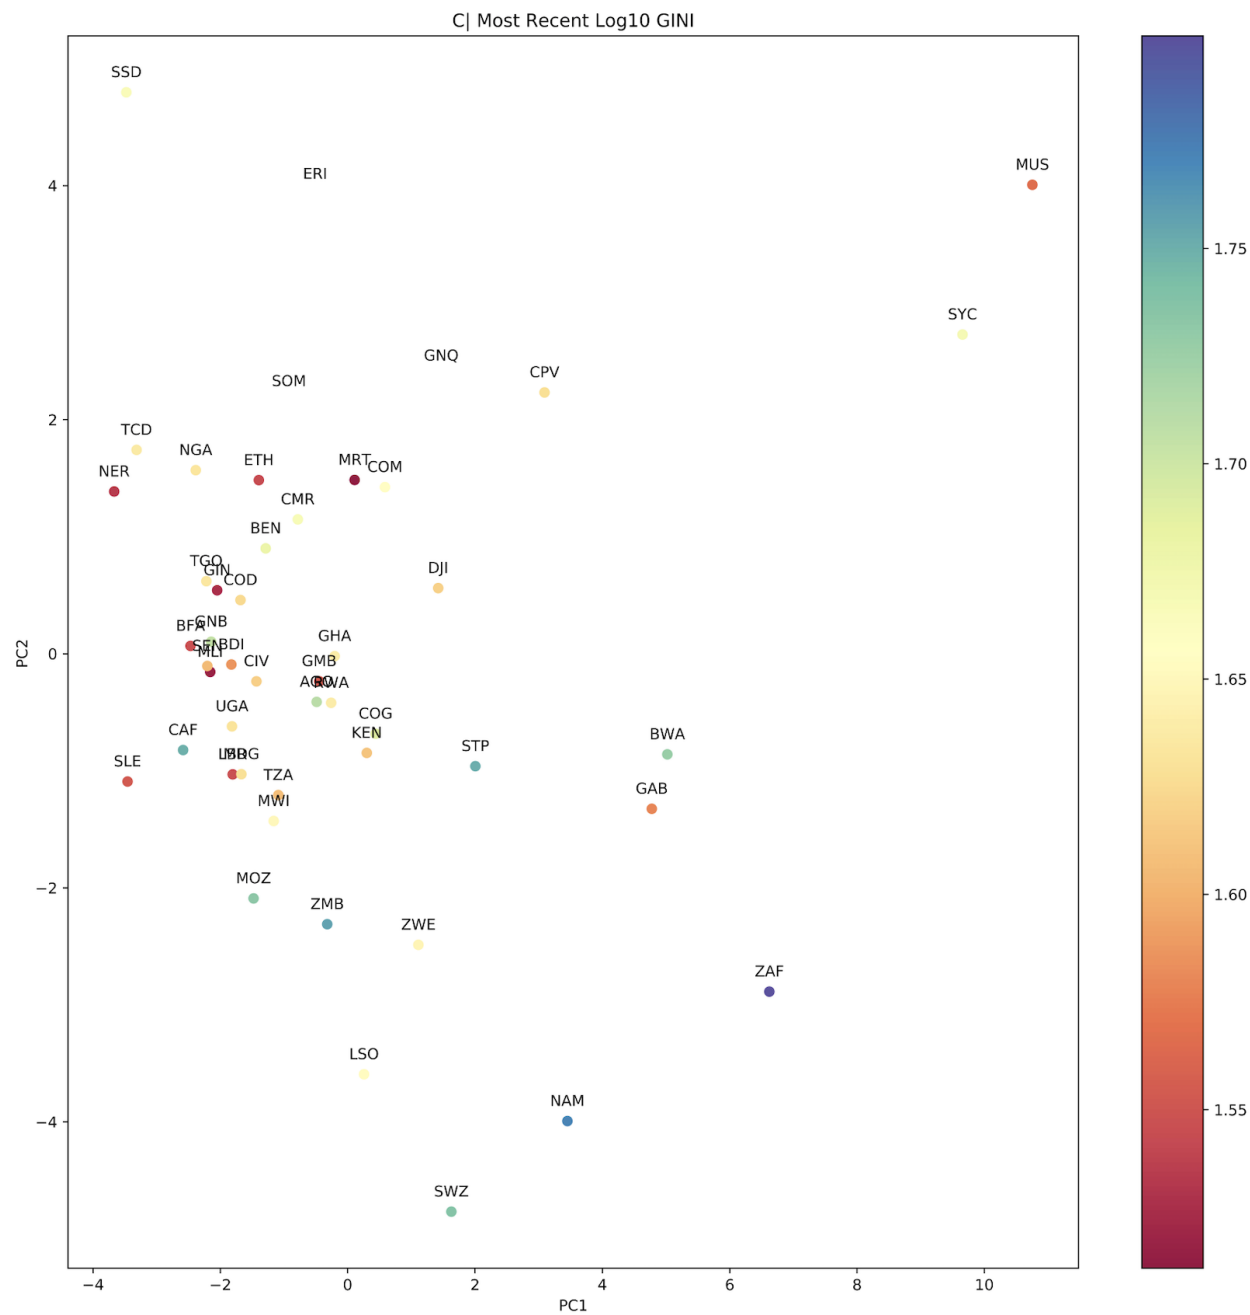

659

660

661

662 (Figure S5 continued)

### 663 **Figure S5**

#### 664 **Principal Component Analysis of all variables and category specific subsets of variables**

665 **D:** Scree plot showing the cumulative proportion of variance explained by principal component for analysis done  
666 using all variables (blue, 29 variables), comorbidity indicators (green, 14 variables, Section B in **Table S3**), and  
667 access to care indicators (orange, 8 variables, Section E in **Table S3**)

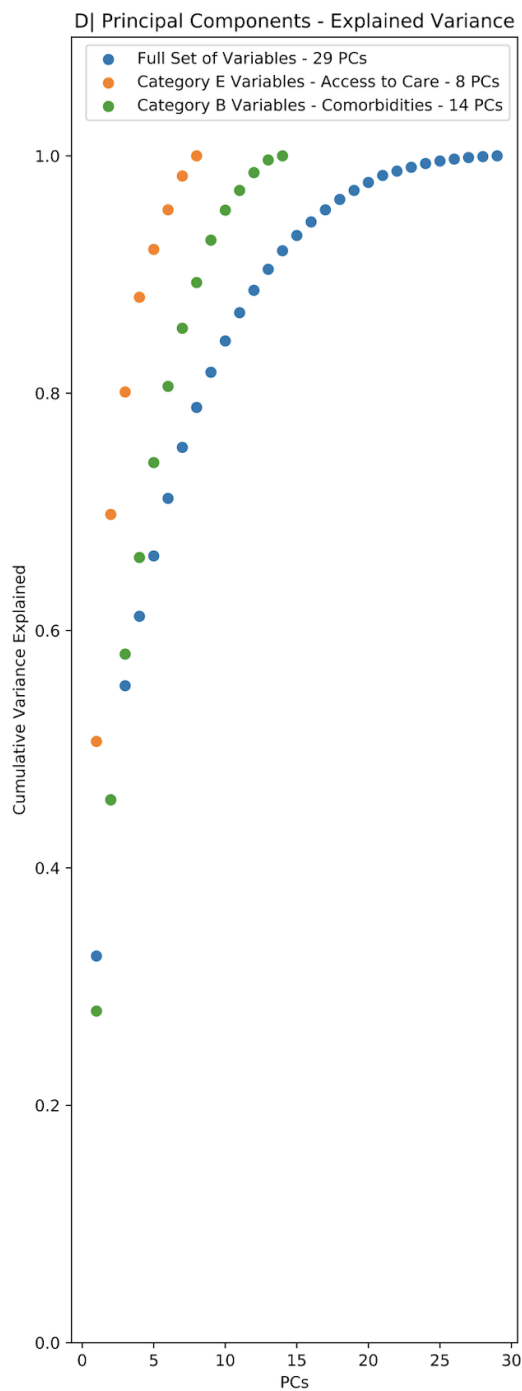

668

669

## 670 **A4 | Evaluating the burden emerging from the severity of infection** 671 **outcome**

672

### 673 *4.1 Data sourcing: Empirical estimates of IFR*

674

675 Estimates of the infection fatality ratio (*IFR*) that account for asymptomatic cases,  
676 underreporting, and delays in reporting are few, however, it is evident that *IFR* increases  
677 substantially with age<sup>66</sup>. We use age-stratified estimates of *IFR* from three studies (two  
678 published<sup>2,4</sup>, one preprint<sup>3</sup>) that accounted for these factors in their estimation (**Table S4**).

679

680 **Table S4: Sources of age-stratified IFR estimates**

| Study                            | Population                                                                                                                      | Methods                                                                                                                                                                                                             |
|----------------------------------|---------------------------------------------------------------------------------------------------------------------------------|---------------------------------------------------------------------------------------------------------------------------------------------------------------------------------------------------------------------|
| Salje et al. 2020 <sup>2</sup>   | Deaths and hospitalizations due to COVID-19 in French public and private hospitals across the country between 13 March - 11 May | Combined data from France with data from Diamond Princess Cruise ship to estimate age-stratified IFR, case severity, and hospitalization probabilities accounting for asymptomatic cases and underascertainment.    |
| Verity et al. 2020 <sup>4</sup>  | Deaths due to COVID-19 in Hubei province, China                                                                                 | Combined data from Hubei with data from PCR testing of repatriated citizens under quarantine to estimate age-stratified IFR accounting for asymptomatic cases and underascertainment.                               |
| Rinaldi et al. 2020 <sup>3</sup> | Deaths due to COVID-19 reported in Lombardia, Italy                                                                             | Analyzed deaths in the Lombardia region, one of the hardest hit regions in Italy, and used seroprevalence surveys of the region to estimate that 30% of the population was infected to estimate age-stratified IFR. |

681

682 To apply these estimates to other age-stratified data with different bin ranges and generate  
683 continuous predictions of *IFR* with age, we fit the relationship between the midpoint of the age  
684 bracket and the *IFR* estimate using a generalized additive model (GAM) using the 'mgcv'  
685 package<sup>67</sup> in R version 4.0.2<sup>68</sup>. We use a beta distribution as the link function for IFR estimates  
686 (data distributed on [0, 1]). For the upper age bracket (80+ years), we take the upper range to  
687 be 100 years and the midpoint to be 90.

688

689 We assume a given level of cumulative infection (here 20% in each age class, i.e., a constant  
690 rate of infection among age classes) and then apply *IFRs* by age to the population structure of  
691 each country to generate estimates of burden. Age structure estimates were taken from the  
692 UNPOP (see **Table S3**) country level estimates of population in 1 year age groups (0 - 100  
693 years of age) to generate estimates of burden.

694

695

696



697 *4.2 Data sourcing: Comorbidities over age from IHME*

698

699 Applying these *IFR* estimates to the demographic structure of SSA countries provides a  
700 baseline expectation for mortality, but depends on the assumption that mortality patterns in sub-  
701 Saharan Africa will be similar to those from where the *IFR* estimates were sourced (France,  
702 China, and Italy). Comorbidities have been shown to be an important determinant of the severity  
703 of infection outcomes (i.e., *IFR*); to assess the relative risk of comorbidities across age in SSA,  
704 estimates of comorbidity severity by age (in terms of annual deaths attributable) were obtained  
705 from the Institute for Health Metrics and Evaluation (IHME) Global Burden of Disease (GBD)  
706 study in 2017<sup>69</sup>. Data were accessed through the GBD results tool for cardiovascular disease,  
707 chronic respiratory disease (not including asthma), and diabetes, reflecting three categories of  
708 comorbidity with demonstrated associations with risk (**Table S2**). We make the assumption that  
709 higher mortality rates due to these NCDs, especially among younger age groups, is indicative of  
710 increased severity and lesser access to sufficient care for these diseases - suggesting an  
711 elevated risk for their interaction with SARS-CoV-2 as comorbidities. While there are significant  
712 uncertainties in these data, they provide the best estimates of age specific risks and have been  
713 used previously to estimate populations at risk<sup>18</sup>.

714

715 The comorbidity by age curves for SSA countries were compared to those for the three  
716 countries from which SARS-CoV-2 *IFR* by age estimates were sourced. Attributable mortality  
717 due to all three NCD categories is higher at age 50 in all 48 SSA countries when compared to  
718 estimates from France and Italy and for 42 of 48 SSA countries when compared to China  
719 (**Figure S5**).

720

721 Given the potential for populations in SSA to experience a differing burden of SARS-CoV-2 due  
722 to their increased severity of comorbidities in younger age groups, we explore the effects of  
723 shifting *IFRs* estimated by the GAM of *IFR* estimates from France, Italy, and China younger by  
724 2, 5, and 10 years (**Figure 3** in main text).

725 **Figure S6**

726 **Comorbidity burden by age in sub-Saharan Africa**

727 Estimated mortality per age group for sub-Saharan African countries (gray lines) compared to China, France, and  
728 Italy (the countries from which estimates of SARS-CoV-2 infection fatality ratios (*IFRs*) by age are available) for three  
729 NCD categories (cardiovascular diseases, chronic respiratory diseases excluding asthma, and diabetes).

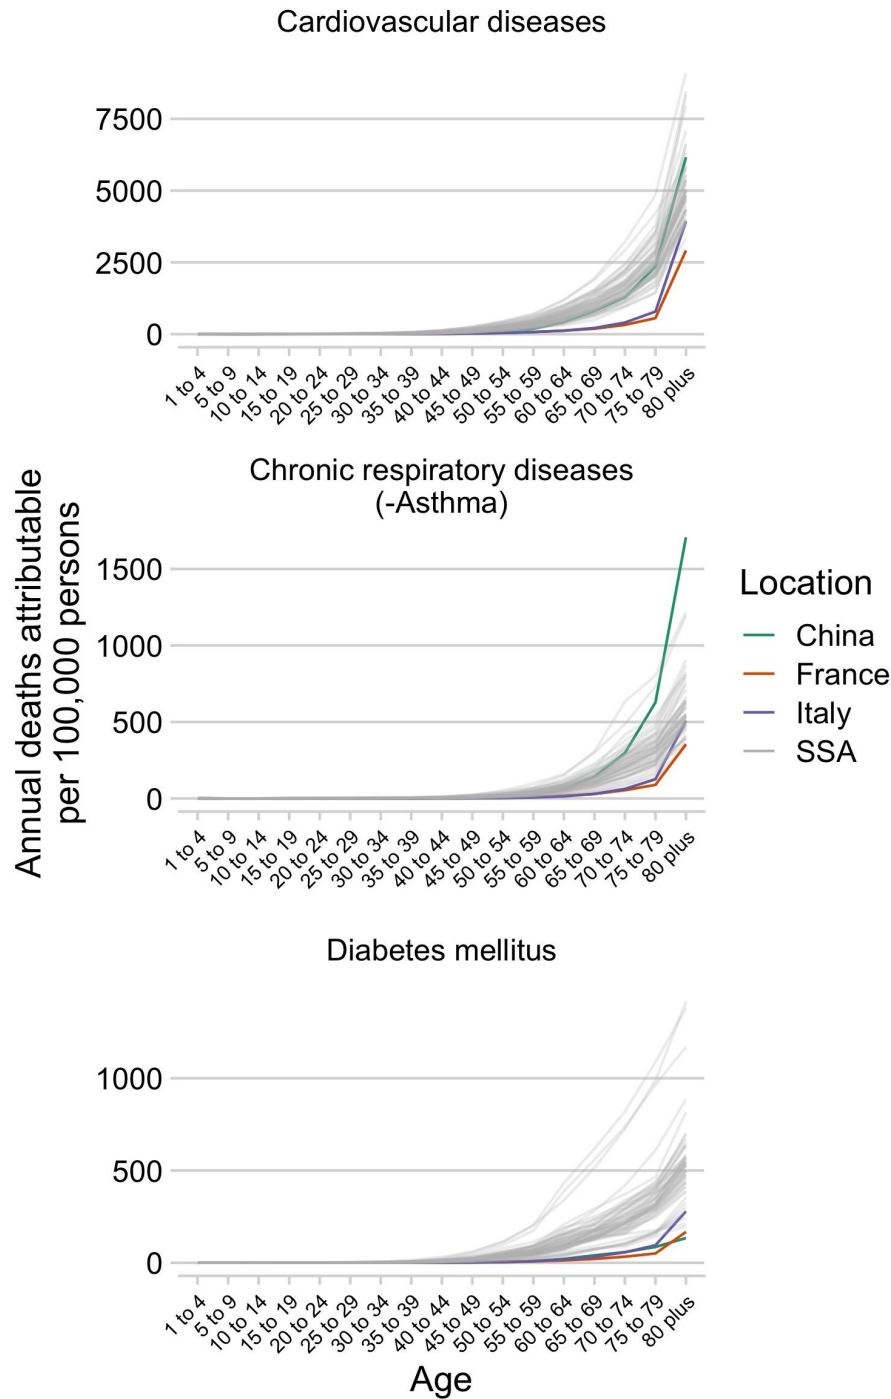

730  
731

## 732 **A5 | International Air Travel to SSA**

733

734 The number of passenger seats on flights arriving to international airports were grouped by  
735 country and month for January 2020 to April 2020 (**Table S5**) - the months when the  
736 introduction of SARS-CoV-2 to SSA countries was likely to have first occurred. The first  
737 confirmed case reported from a SSA country, per the Johns Hopkins Coronavirus Research  
738 Center was in Nigeria on February 28, 2020. By March 31, 2020, 43 of 48 SSA countries had  
739 reported SARS-CoV-2 infections and international travel was largely restricted by April. Lesotho  
740 was the last SSA country to report a confirmed SARS-CoV-2 infection (on May 13, 2020);  
741 however, given difficulties in surveillance, the first reported detections were likely delayed  
742 relative to the first importations of the virus.

743

744 The probability of importation of the virus is defined by the number of travelers from each source  
745 location each date and the probability that a traveler from that source location on that date was  
746 infectious. Due to limitations in surveillance, especially early in the SARS-CoV-2 pandemic,  
747 empirical data on infection rates among travelers is largely lacking. To account for differences in  
748 the status of the SARS-CoV-2 pandemic across source locations, and thus differences in the  
749 importation risk for travelers from those locations, we coarsely stratified travelers arriving each  
750 day into four categories based on the status of their source countries:

751

- 752 i. Travelers from countries with zero reported cases (i.e., although undetected  
753 transmission was possibly occurring, SARS-CoV had not yet been confirmed in the  
754 source country by that date)
- 755 ii. Those traveling from countries with more than one reported case (i.e., SARS-CoV-2 had  
756 been confirmed to be present in that source country by that date),
- 757 iii. Those traveling from countries with more than 100 reported cases (indicating community  
758 transmission was likely beginning), and
- 759 iv. Those traveling from countries with more than 1000 reported cases (indicating  
760 widespread transmission)

761

762 For determining reported case counts at source locations for travelers, no cases were reported  
763 outside of China until January 13, 2020 (the date of the first reported case in Thailand). Over  
764 January 13 to January 21, cases were then reported in Japan, South Korea, Taiwan, Hong  
765 Kong, and the United States (<https://covid19.who.int/>). Subsequently, counts per country were  
766 tabulated daily by the Johns Hopkins Coronavirus Resource Center <sup>70</sup> beginning January 22  
767 (<https://coronavirus.jhu.edu/map.html>); we use that data from January 22 onwards and the  
768 WHO reports prior to January 22.

769

770 The number of travelers within each category arriving per month is shown in **Table S5**. This  
771 approach makes the conservative assumption that the probability a traveler is infected reflects  
772 the general countrywide infection rate of the source country at the time of travel (i.e., travelers  
773 are not more likely to be exposed than non-travelers in that source location) and does not  
774 account for complex travel itineraries (i.e., a traveler from a high risk source location transiting  
775 through a low risk source location would be grouped with other travelers from the low risk

776 source location). Consequently, the risk for viral importation is likely systematically  
777 underestimated. However, as the relative risk for viral importation will still scale with the number  
778 of travelers, comparisons among SSA countries can be informative (e.g., SSA countries with  
779 more travelers from countries with confirmed SARS-CoV-2 transmission are at higher risk for  
780 viral importation).

781  
782

### 783 **Table S5**

#### 784 **Arrivals to SSA airports by the number of passenger seats and status of the SARS-CoV-2** 785 **pandemic at the origin at the time of travel**

786  
787 (see csv file: "Table S5 International Airtravel to SSA.csv")

788  
789 Data Fields:

- 790
- 791 1. country: Name of country
  - 792 2. n\_airports: Number of airports with flight data
  - 793 3. month: January, February, March, April 2020; or total for all 4 months
  - 794 4. total\_n\_seats: Total number of passenger seats on arriving aircraft
  - 795 5. From source with cases > 0: Number of passengers arriving from source locations with 1 or more reported  
796 SARS-CoV-2 infection by the date of travel
  - 797 6. From source with cases > 100: Number of passengers arriving from source locations more than 100  
798 reported SARS-CoV-2 infection by the date of travel
  - 799 7. From source with cases > 1000: Number of passengers arriving from source locations with more than 1000  
800 reported SARS-CoV-2 infection by the date of travel

801  
802

## 803 **A6 | Subnational connectivity among countries in sub-Saharan Africa**

804

### 805 *6.1. Indicators of subnational connectivity*

806

807 To allow comparison of the relative connectivity across countries, we use the friction surface  
808 estimates provided by Weiss et al.<sup>24</sup> as a relative measure of the rate of human movement  
809 between subregions of a country. For connectivity within subregions of a country (e.g., transport  
810 from a city to the rural periphery), we use as an indicator the population weighted mean travel  
811 time to the nearest urban center (i.e., population density > 1,500 per square kilometer or a  
812 density of built-up areas > 50% coincident with population > 50,000) within administrative-2  
813 units<sup>63</sup>. For some countries, estimates at administrative-2 units were unavailable (Comoros,  
814 Cape Verde, Lesotho, Mauritius, Mayotte, and Seychelles); estimates at the administrative-1  
815 unit level were used for these cases (these were all island nations, with the exception of  
816 Lesotho).

817

### 818 *6.2. Metapopulation model methods*

819

820 Once SARS-CoV-2 has been introduced into a country, the degree of spread of the infection  
821 within the country will be governed by subnational mobility: the pathogen is more likely to be  
822 introduced into a location where individuals arrive more frequently than one where incoming  
823 travellers are less frequent. Large-scale consistent measures of mobility remain rare. However,  
824 recently, estimates of accessibility have been produced at a global scale<sup>24</sup>. Although this is  
825 unlikely to perfectly reflect mobility within countries, especially as interventions and travel  
826 restrictions are put in place, it provides a starting point for evaluating the role of human mobility  
827 in shaping the outbreak pace across SSA. We use the inverse of a measure of the cost of travel  
828 between the centroids of administrative level 2 spatial units to describe mobility between  
829 locations (estimated by applying the costDistance function in the *gdistance* package in R to the  
830 friction surfaces supplied in ref<sup>24</sup>). With this, we develop a metapopulation model for each  
831 country to develop an overview of the possible range of trajectories of unchecked spread of  
832 SARS-CoV-2.

833

834 We assume that the pathogen first arrives into each country in the administrative 2 level unit  
835 with the largest population (e.g., the largest city) and the population in each administrative 2  
836 level (of size  $N_j$ ) is entirely susceptible at the time of arrival. We then track spread within and  
837 between each of the administrative 2 level units of each country. Within each administrative 2  
838 level unit, dynamics are governed by a discrete time Susceptible (S), Infected (I) and Recovered  
839 (R) model with a time-step of ~ 1 week, which is broadly consistent with the serial interval of  
840 SARS-CoV-2. Within the spatial unit indexed  $j$ , with total size  $N_j$ , dynamics follow:

841

842

$$I_{j,t+1} = \beta I_{j,t} S_{j,t} / N_j + \iota_{j,t}$$

843

$$S_{j,t+1} = S_{j,t} - I_{j,t+1} + b$$

844

845 where  $\beta$  captures the magnitude of transmission over the course of one serial interval (and is set  
846 to 2.5 to approximately represent the  $R_0$  of SARS-CoV-2); the exponent  $\alpha = 0.97$  is used to  
847 capture the effects of discretization<sup>71</sup>,  $\iota_{j,t}$  captures the introduction of new infections into site  $j$  at  
848 time  $t$ , and  $b$  reflects the introduction of new susceptible individuals resulting from the birth rate,  
849 set to reflect the most recent estimates for that country from the World Bank Data Bank  
850 (<https://data.worldbank.org/indicator/SP.DYN.CBRT.IN>).

851  
852 We make the simplifying assumption that mobility linking locations  $i$  and  $j$ , denoted  $c_{i,j}$ , scales  
853 with the inverse of the cost of travel between sites  $i$  and  $j$  evaluated according to the friction  
854 surface provided in<sup>24</sup>. The introduction of an infected individual into location  $j$  is then defined by  
855 a draw from a Bernoulli distribution following:

856 
$$\iota_{j,t} \sim \text{Bern}(1 - \exp(-\sum_1^L c_{i,j} I_{i,t} / N_i))$$

857 where  $L$  is the total number of administrative 2 units in that country, and the rate of introduction  
858 is the product of connectivity between the focal location and each other location multiplied by  
859 the proportion of population in each other location that is infected.

860  
861 Some countries show rapid spread between administrative units within the country (e.g., a  
862 country with parameters that broadly reflect those available for Malawi, **Figure S7**), while in  
863 others (e.g., reflecting Madagascar), connectivity may be so low that the outbreak may be over  
864 in the administrative unit of the largest size (where it was introduced) before introductions  
865 successfully reach other poorly connected administrative units. The result is a hump shaped  
866 relationship between the fraction of the population that is infected after 5 years and the time to  
867 the first local extinction of the pathogen (**Figure S7**, right top). In countries with lower  
868 connectivity (e.g., that might resemble Madagascar), local outbreaks can go extinct rapidly  
869 before travelling very far; in other countries (e.g., that might resemble Gabon), the pathogen  
870 goes extinct rapidly because it travels rapidly and rapidly depletes susceptible individuals  
871 everywhere.

872  
873 The impact of the pattern of travel between centroids is echoed by the pattern of travel within  
874 administrative districts: countries where the pathogen does not reach a large fraction of the  
875 administrative 2 units within the country in 5 years are also those where within administrative  
876 unit travel is low (**Figure S7**, right bottom).

877  
878 These simulations provide a window onto qualitative patterns expected for subnational spread  
879 of the pandemic virus, but there is no clear way of calibrating the absolute rate of travel between  
880 regions of relevance for SARS-CoV-2. Thus, the time-scales of these simulations should be  
881 considered in relative, rather than absolute terms. Variation in lockdown effectiveness, or other  
882 changes in mobility for a given country may also compromise relative comparisons. Variability in  
883 case reporting complicates clarifying this (**Figure S8**).

884 **Figure S7**

885 **Pace of the outbreak**

886 Each grey line on the left hand panels indicates the total infected across all administrative units in a metapopulation  
887 simulation with parameters reflecting the country indicated by the plot title, assuming interventions are constant.  
888 Increases after the first peak indicate the pathogen reaching a new administrative 2 unit. In Malawi-like settings  
889 (higher connectivity), more administrative units are reached rapidly, whereas in Madagascar-like settings (lower  
890 connectivity), a lower proportion of the administrative units are reached by a given time, as fewer introductions occur  
891 before the outbreak has burned out in the administrative 2 unit with the largest population. More generally, rapid  
892 disappearance of the outbreak (top right hand plot, y axis shows time to extinction) could either indicate rapid spread  
893 with a high proportion of the countries' population reached (top right hand plot, x axis) or slow spread, with many  
894 administrative units unreached, and therefore remaining susceptible. The pattern of between-administrative unit travel  
895 also echoes travel time within administrative units (lower panel, right hand side, x axis indicates fraction of  
896 administrative units unreached, and upper panel indicates travel time in hours to the nearest city of 50,000 or more  
897 people).

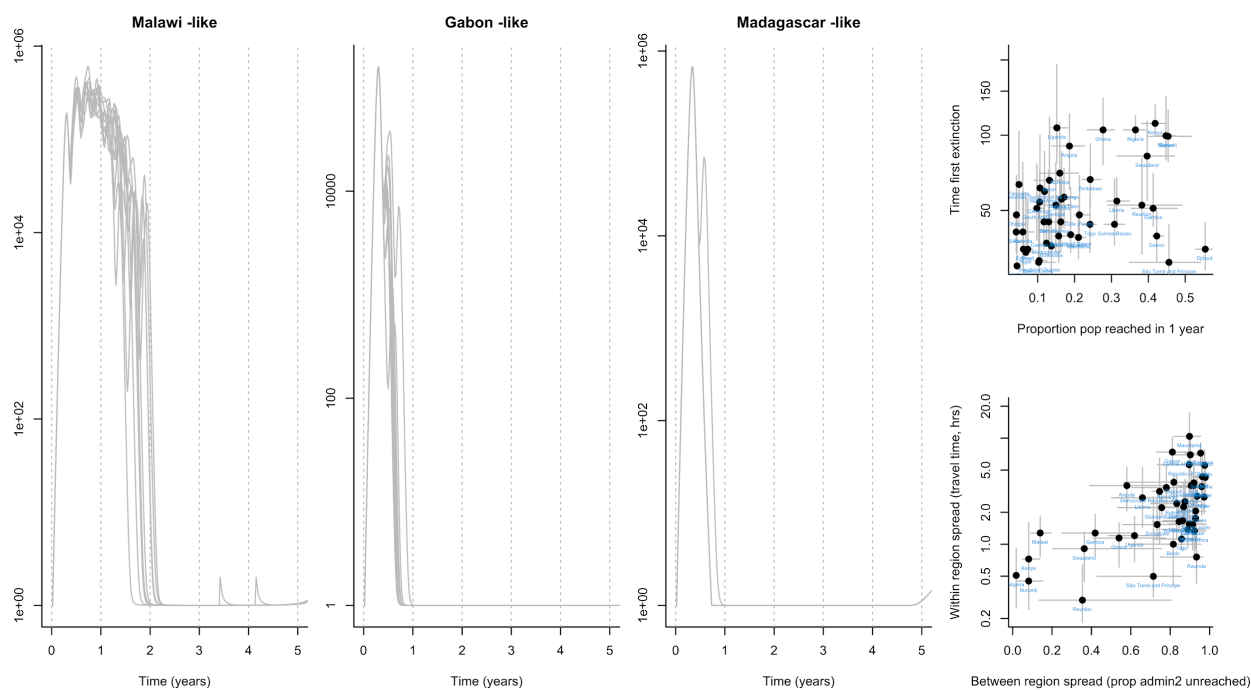

898

899

900 **Figure S8**

901 **Cases and testing vs. the pace of the outbreak**

902 The total number of confirmed cases reported by country (x axis, left, as reported for June 28th by Africa CDC) and  
903 the test positivity (x axis, right, defined as the total number of confirmed cases divided by the number of tests run, as  
904 reported by Africa CDC, likewise) show no significant relationship with the proportion of the population estimated to  
905 be infected after one year using the metapopulation simulation described in A6 (respectively,  $\rho = -0.04, p > 0.5, df =$   
906  $41$  and  $\rho = 0.02, p > 0.5, df = 41$ ). All else equal, a positive relationship is expected; however, both uncertainty in  
907 case numbers, and uncertainty associated with the simulation might both drive the absence of a signal.  
908

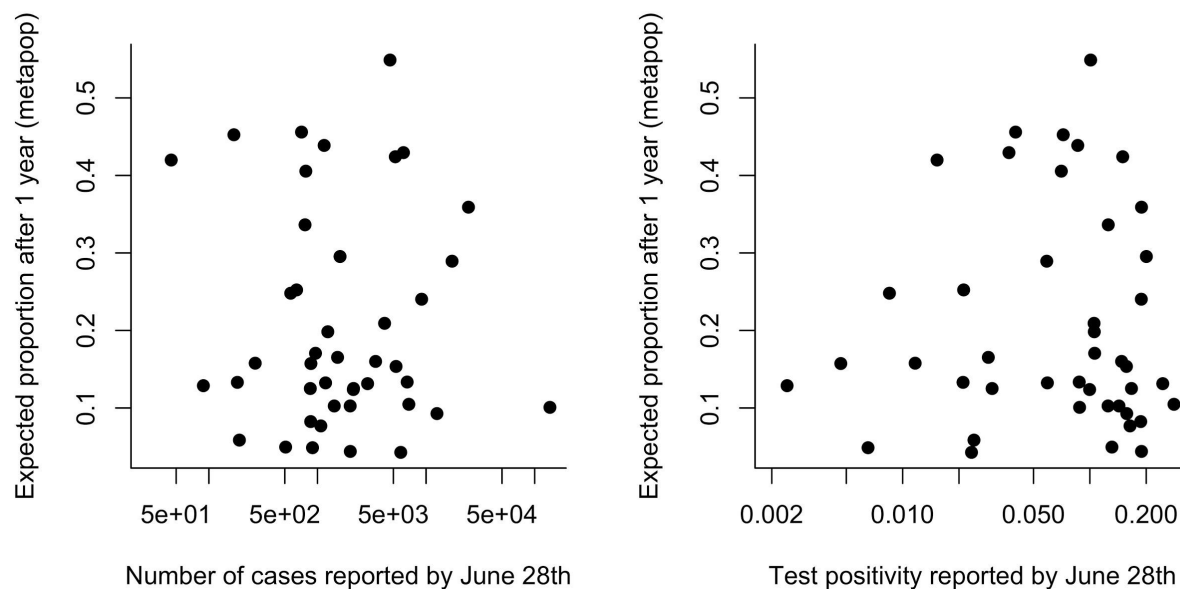

909  
910



## 911 **A7 | Modeling epidemic trajectories in scenarios where transmission** 912 **rate depends on climate**

913

### 914 *7.1 Climate data sourcing: Variation in humidity in SSA*

915

916 Specific humidity data for selected urban centers comes from ERA5 using an average  
917 climatology (1981-2017)<sup>47</sup>; we do not consider year-to-year climate variations. Selected cities ( $n$   
918 = 58) were chosen to represent the major urban areas in SSA. The largest city in each SSA  
919 country was included as well as any additional cities that were among the 25 largest cities or  
920 busiest airports in SSA.

921

### 922 *7.2 Methods for climate driven modelling of SARS-CoV-2*

923

924 We use a climate-driven SIRS (Susceptible-Infected-Recovered-Susceptible) model to estimate  
925 epidemic trajectories (i.e., the time of peak incidence) in different cities in 2020, assuming no  
926 control measures are in place<sup>23,72</sup>. The model is given by:

927

$$928 \quad \frac{dS}{dt} = \frac{N - S - L}{L} - \frac{\beta(t)IS}{N}$$
$$929 \quad \frac{dI}{dt} = \frac{\beta(t)IS}{N} - \frac{I}{D}$$

930

931 where  $S$  is the susceptible population,  $I$  is the infected population and  $N$  is the total population.  
932  $D$  is the mean infectious period, set at 5 days following ref<sup>23,49</sup>. To investigate the maximum  
933 possible climate effect, we use parameters from the most climate-dependent scenario in ref<sup>23</sup>,  
934 based on betacoronavirus HKU1. In this scenario  $L$ , the duration of immunity, is found to be  
935 66.25 weeks (i.e., greater than 1 year and such that waning immunity does not affect timing of  
936 the epidemic peak).

937

938 Transmission is governed by  $\beta(t)$  which is related to the basic reproduction number  $R_0$  by  
939  $R_0(t) = \beta(t)D$ . The basic reproduction number varies based on the climate and is related to  
940 specific humidity according to the equation:

941

$$942 \quad R_0 = \exp(a * q(t) + \log(R_{0max} - R_{0min})) + R_{0min}$$

943

944 where  $q(t)$  is specific humidity<sup>47</sup> and  $a$  is set at -227.5 based on estimated HKU1 parameters<sup>23</sup>.  
945  $R_{0max}$  and  $R_{0min}$  are 2.5 and 1.5 respectively. We assume the same time of introduction for all  
946 cities, set at March 1<sup>st</sup>, 2020 (consistent with the first reported cases in SSA, **Figure S1D**)

947

948
